1 **Primordial capsid and spooled ssDNA genome structures penetrate**  
2 **ancestral events of eukaryotic viruses**

3

4 Anna Munke<sup>1\*#</sup>, Kei Kimura<sup>2</sup>, Yuji Tomaru<sup>3</sup>, Han Wang<sup>1</sup>, Kazuhiro Yoshida<sup>4</sup>, Seiya Mito<sup>5</sup>, Yuki  
5 Hongo<sup>6</sup>, and Kenta Okamoto<sup>1\*</sup>

6 1. The Laboratory of Molecular Biophysics, Department of Cell and Molecular Biology, Uppsala  
7 University, Uppsala, Sweden

8 2. Department of Biological Resource Science, Faculty of Agriculture, Saga University, Saga, Japan

9 3. Fisheries Technology Institute, Japan Fisheries Research and Education Agency, Hatsukaichi,  
10 Hiroshima, Japan

11 4. Graduate School of Agriculture, Saga University, Saga, Japan

12 5. Department of Biological Resource Science, Faculty of Agriculture, Saga University, Saga, Japan

13 6. Bioinformatics and Biosciences Division, Fisheries Resources Institute, Japan Fisheries Research  
14 and Education Agency, Fukuura, Kanazawa, Yokohama, Kanagawa, Japan

15

16

17 \*Corresponding authors

18 Corresponding author 1: [anna.munke@desy.de](mailto:anna.munke@desy.de)

19 Corresponding author 2: [kenta.okamoto@icm.uu.se](mailto:kenta.okamoto@icm.uu.se)

20

21

22 <sup>#</sup>Present address: Center for Free Electron Laser Science, Deutsches Elektronen-Synchrotron DESY,  
23 Hamburg 22607, Germany

## 24 **Abstract**

25 Marine algae viruses are important for controlling microorganism communities in the marine  
26 ecosystem, and played a fundamental role during the early events of viral evolution. Here, we have  
27 focused on one major group of marine algae viruses, the ssDNA viruses from the *Bacilladnaviridae*  
28 family. We present the capsid structure of the bacilladnavirus, *Chaetoceros tenuissimus* DNA virus  
29 type II (CtenDNAV-II), determined at 2.3 Å resolution. Structural comparison to other viruses  
30 supports the previous theory where bacilladnaviruses were proposed to have acquired their capsid  
31 protein via horizontal gene transfer from a ssRNA virus. The capsid protein contains the widespread  
32 virus jelly-roll fold, but has additional unique features; a third  $\beta$ -sheet and a long C-terminal tail,  
33 which are located on the capsid surface and could be important for virus transmission. Further, low-  
34 resolution reconstructions of the CtenDNAV-II genome reveal a partially spooled structure, an  
35 arrangement previously only described for dsRNA and dsDNA viruses.

36  
37 **Key words:** algae virus, asymmetric reconstruction, CRESS-DNA, *Cressdnaviricota*, cryo-EM,  
38 *Bacilladnaviridae*, bacilladnavirus, diatom virus, evolution, genome structure, spooled genome

## 39 Introduction

40 Marine algae viruses prevail massively in the oceans and greatly affect the global ecosystem by  
41 causing mortality and lysis of microbial communities, releasing organic carbon and other nutrients  
42 back into the environment (the ‘viral shunt’), thereby affecting the global oxygen level, and the marine  
43 nutrient and energy cycling (Fuhrman, 1999; Suttle, 2007; Wilhelm and Suttle, 1999). Algae blooms  
44 are global phenomena of dynamic appearance and disappearance of certain algae species. The  
45 recurring patterns of algae blooms are associated with the presence of marine diatom/algae viruses  
46 (Bratbak et al., 1993; Johannessen et al., 2017; Tarutani et al., 2000). The viruses typically have a very  
47 narrow host range, thus causing host-specific mortality and control of algae host populations  
48 (Brussaard, 2004), and are therefore attractive for being used as a microbial agent against harmful  
49 algae blooms (Nagasaki et al., 1999).

50 Another incentive for studying marine algal viruses is for penetrating early evolutionary scenarios  
51 of primordial eukaryotic viruses. Since unicellular marine organisms were the earliest eukaryotes on  
52 earth, they were presumably host of the most ancient viruses (Dolja and Koonin, 2018; Koonin et al.,  
53 2015). The extant unicellular organisms, such as unicellular algae, therefore likely retain genetic and  
54 structural characteristics from their ascendant (Koonin and Dolja, 2014; Munke et al., 2020).  
55 Structural comparison between so-called primordial viruses, such as diatom viruses, and the  
56 phylogenetically closely related viruses in the same evolutionary lineages can reveal acquired  
57 functional structures in viruses that infect higher eukaryotes such as human, animal and crop  
58 pathogens (Munke et al., 2020; Okamoto et al., 2020, 2016).

59 The *Bacilladnaviridae* viruses in this study are greatly involved in the discussions of both the  
60 global ecosystem model and early virus evolution. The *Bacilladnaviridae* viruses infect a diverse  
61 range of marine bloom-forming algae species (Kimura and Tomaru, 2015; Tomaru et al., 2013, 2011).  
62 These *Bacilladnaviridae* viruses are only infectious to their specific algae host. They lyse the host  
63 algae cells and reduce the number significantly during their propagation (Kimura and Tomaru, 2015;  
64 Tomaru et al., 2011, 2013). Understanding their host-specific transmission mechanism is the key to  
65 clarify how these ssDNA viruses affect the dynamics of bloom-forming algae species.  
66 Bacilladnaviruses carry a circular ssDNA genome of ~6 kb, which is partially double-stranded (~700-  
67 800 bp) and encodes three proteins; one coat protein, one replication protein (Rep), and a third protein  
68 with unknown function (Kimura and Tomaru, 2015). Until recently, bacilladnaviruses have been  
69 included in the informal group CRESS DNA viruses (for *circular Rep-encoding ssDNA viruses*), but  
70 this group has now formed the phylum *Cressdnaviricota* (Krupovic et al., 2020).

71 Viruses with different nucleic acid types have traditionally been organised into different classes,  
72 however an increasing number of evidence has emerged during the last decade suggesting that RNA-  
73 DNA recombination is much more prevalent than previously recognized (Diemer and Stedman, 2012;  
74 Kazlauskas et al., 2017; Krupovic, 2013; Tisza et al., 2020). In terms of bacilladnaviruses, Kazlauskas  
75 *et al* suggested based on sequence homology that their capsid proteins likely have been acquired  
76 through horizontal gene transfer (HGT) from an ancestral noda-like virus (Kazlauskas et al., 2017).  
77 This is not an unreasonable scenario considering the prevalence of noda-like viruses in the aquatic  
78 environment (Wolf et al., 2020). The icosahedral capsid of the *Bacilladnaviridae* viruses has adapted  
79 to pack a ssDNA genome instead of a ssRNA genome, however the lack of available capsid and  
80 genome structures of icosahedral ssDNA viruses have prevented addressing this theory.

81 Here, we present 3D reconstructions that reveal both the capsid and genome organization of the  
82 bacilladnavirus *Chaetoceros tenuissimus* DNA virus type II (CtenDNAV-II). An atomic model of the  
83 capsid protein could be constructed from the 2.3 Å resolution capsid structure. The capsid protein  
84 contains a jelly-roll fold with two additional extensions; a third seven-stranded  $\beta$ -sheet that is  
85 intertwined within the jelly-roll and C-terminal tails in two of the three proteins that form the

86 icosahedral asymmetric unit. Both extensions, which are unique to the bacilladnaviruses, are located  
87 on the capsid surface and display a higher intraspecies sequence variability compared to other parts of  
88 the capsid protein, suggesting a functional role during virus transmission. The virus transmission is  
89 further discussed with support from a hemagglutination inhibition assay, adsorption test and sequence  
90 data. The DALI program (Holm, 2020a) was used to demonstrate that the capsid of the  
91 bacilladnaviruses indeed are structurally more similar to capsids of RNA viruses than to those of other  
92 ssDNA viruses, corroborating the HGT theory in early virus evolution. In addition, the first genome  
93 structure of a ssDNA virus presented here suggests a spooled genome packaging mechanism, which  
94 has previously only been described for dsRNA and dsDNA viruses.

## 95 Results

### 96 Summary of structure determination

97 The structure of the CtenDNAV-II virion was determined using cryo-electron microscopy (cryo-EM).  
 98 A Titan Krios microscope (Thermo Fisher Scientific) equipped with a K2 Summit direct electron  
 99 detector (Gatan) (see Materials and Methods) was used to record micrographs (Supplementary Fig.  
 100 1A) and confirmed mature virions containing a DNA genome. The particles had a diameter of  
 101 approximately 35 nm and appeared to be morphologically reproducible. The three-dimensional (3D)  
 102 reconstruction of CtenDNAV-II was performed with RELION (Scheres, 2012). The capsid was  
 103 reconstructed by imposing icosahedral symmetry (I4) and using 33,507 particles, whereas the genome  
 104 structure was reconstructed without imposing any symmetry (C1) and using 21,559 particles. The  
 105 overall resolution of the final maps were estimated using the “gold standard” Fourier shell correlation  
 106 (FSC) 0.143 criterion (Henderson et al., 2012; Scheres and Chen, 2012) to 2.3 Å for the capsid  
 107 (Supplementary Fig. 1C) and 13 and 23 Å for the two genome reconstructions (Supplementary Fig. 2).  
 108 The local resolution of the capsid reconstruction was distributed between 2.3 and 9.1 Å and estimated  
 109 using ResMap (Kucukelbir et al., 2014) (Supplementary Fig. 1D). An atomic model was built, refined,  
 110 and validated according to our cryo-EM map. Data acquisition and processing, refinement, and  
 111 validation statistics are summarized in Table 1.

112

113 **Table 1. Data collection, processing and refinement statistics**

| Data collection and processing                        | Capsid<br>EMD-12554 | Genome – outer layer<br>EMD-12555 | Genome – core<br>EMD-12556 |
|-------------------------------------------------------|---------------------|-----------------------------------|----------------------------|
| Magnification                                         | 140,000             |                                   |                            |
| Voltage (kV)                                          | 300                 |                                   |                            |
| Defocus range (µm)                                    | -1.00 to -3.00      |                                   |                            |
| Microscope                                            | Titan Krios         |                                   |                            |
| Camera                                                | K2                  |                                   |                            |
| Total electron dose (e <sup>-</sup> /Å <sup>2</sup> ) | 37                  |                                   |                            |
| Pixel size (Å)                                        | 1.06                |                                   |                            |
| Final particle number                                 | 33,507              | 21,559                            |                            |
| Symmetry imposed                                      | I4                  | C1                                |                            |
| Map resolution (Å) (FSC=0.143)                        | 2.3                 | 13                                | 23                         |
| Map resolution range (Å)                              | 2.3-9.1             |                                   |                            |
| Map sharpening B-factor (Å <sup>2</sup> )             | -70.5027            |                                   |                            |
| <b>Model building and refinement</b>                  |                     |                                   |                            |
| PDB                                                   | XXXX                |                                   |                            |
| Model composition                                     |                     |                                   |                            |
| Chains                                                | 3                   |                                   |                            |
| Atoms                                                 | 13933               |                                   |                            |
| Protein residues                                      | 906                 |                                   |                            |
| B-factors (Å <sup>2</sup> ) (min/max/mean)            | 4.67/33.32/12.03    |                                   |                            |
| Bonds (RMSD)                                          |                     |                                   |                            |
| Length (Å)                                            | 0.005               |                                   |                            |
| Angle (°)                                             | 0.724               |                                   |                            |
| Validation                                            | 1.79                |                                   |                            |
| MolProbity score                                      | 1.79                |                                   | N/A                        |
| Clash score                                           | 5.60                |                                   |                            |
| Ramachandran plot (%)                                 |                     |                                   |                            |
| Outliers                                              | 0.00                |                                   |                            |
| Allowed                                               | 4.01                |                                   |                            |
| Favoured                                              | 95.99               |                                   |                            |
| Rotamer outliers (%)                                  | 1.90                |                                   |                            |
| Cβ outliers (%)                                       | 0.00                |                                   |                            |
| CaBLAM outliers (%)                                   | 1.46                |                                   |                            |
| CC (overall)                                          | 0.84                |                                   |                            |
| EMRinger score                                        | 6.16                |                                   |                            |
| d99 masked (full/half1/half2)                         | 2.2/3.3/3.3         |                                   |                            |
| d99 unmasked (full/half1/half2)                       | 2.1/3.1/3.1         |                                   |                            |

114 **The capsid protein displays different conformations within the asymmetric unit**

115 The CtenDNAV-II capsid displays  $T = 3$  symmetry, i.e. 180 capsid protein protomers assemble such  
116 that the asymmetric unit comprises 3 capsid subunits in 3 quasi-equivalent positions termed A, B, and  
117 C (Fig. 1A). For subunit A residues 64-72 and 77-371 were modelled, for subunit B residues 64-371  
118 were modelled, and for subunit C residues 64-357 were modelled. The C-terminus of the A and B  
119 subunits form long tails that end on the capsid surface around the 3- and 5-fold axes respectively.  
120 Here, the last 19 residues could not be modelled (Fig. 2C). Additional density was however visible in  
121 the map when the contour level was decreased (Supplementary Fig. 2), indicating that the C-terminus  
122 forms flexible protrusions on the capsid surface. Another 14 residues were unmodelled in the C-  
123 terminus of the C subunit (red rectangle in Fig. 2C), nevertheless it is clear that, in contrast to the A-  
124 and B-subunits, the C-terminus is directed towards the capsid interior (Fig. 1C). Unmodelled density is  
125 observed on the inside of the capsid below the C subunits (Supplementary Fig. 3), which presumably  
126 originates from the C-terminus of the C subunit, since corresponding unmodelled density was not  
127 visible below the A and B subunits (Supplementary Fig. 3A). Different conformations and/or  
128 flexibility were also observed between the three subunits in the N-termini (Fig. 1C), which are all  
129 located on the inside of the capsid. The first 63 residues of the N-terminus could not be modelled in  
130 any of the three subunits (Fig. 2C). The modelled termini and corresponding cryo-EM map are  
131 displayed in Fig. 1D. Apart from the termini, the three subunits have very similar structures (Fig. 1C).  
132 In addition, unmodelled density, presumably originating from an ion or small molecule, was visible in  
133 the interface of the three subunits that constitute one protomer (Supplementary Fig. 4). The density is  
134 surrounded by six arginine residues (R86 and R272), which is an unusual finding among viruses.  
135 Similar arginine rings have however been described for the HIV virus, in which the arginines interact  
136 with polyanions such as nucleoside triphosphates (dNTPs) and myo-inositol hexaphosphate (IP6)  
137 (Mallery et al., 2018).  
138

139

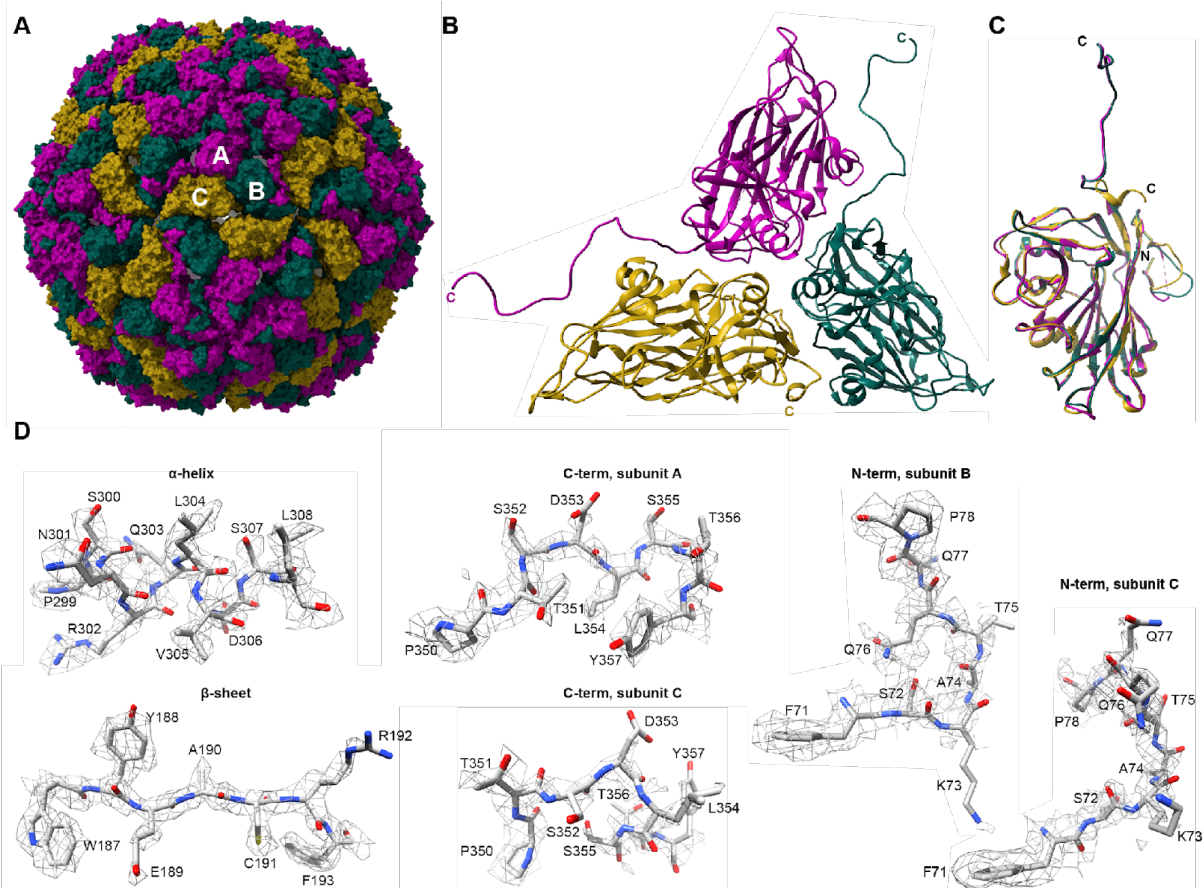

140  
141  
142  
143  
144  
145  
146  
147

**Figure 1. Atomic model of the CtenDNAV-II capsid.** The three subunits, A, B and C, are coloured purple, green and yellow, respectively, in panel A-C. (A) The entire capsid rendered with a surface representation viewed down an icosahedral two-fold axis. (B) The secondary structure of one single asymmetric unit viewed from the outside. (C) Superimposition of the three subunits. (D) Refined side chains of representatives of secondary structural elements and areas that differ between the three subunits.

### 148 The capsid protein jelly-roll fold has unique features

149 The canonical viral jelly-roll consists of eight anti-parallel  $\beta$ -strands that are named from B to I and  
150 arranged in two four-stranded sheets (BIDG and CHEF). The loops connecting each strand are named  
151 BC, CD, etc. (Harrison et al., 1978; Rossmann et al., 1985). For CtenDNAV-II, the two sheets are  
152 formed by strands BIDD'G and C''C'CHEF, respectively (Fig. 2A-C), thus containing three  
153 additional strands (D', C' and C'') compared to the standard viral jelly-roll fold. In addition, a third  
154 antiparallel  $\beta$ -sheet with seven strands is intertwined within the jelly-roll, i.e. strands from the third  
155 sheet are formed by extensions of loops CD, EF and GH of the jelly-roll. The third sheet, which is  
156 located on the capsid surface, is thus composed of two C-strands (C''' and C'''), two E-strands (E'  
157 and E''), and three G-strands (G', G'' and G''') (Fig. 2B). In conclusion, the jelly-roll fold of  
158 CtenDNAV-II has three unique features: three additional strands, an extra surface-exposed  $\beta$ -sheet,  
159 and C-terminal tails in subunit A and B.

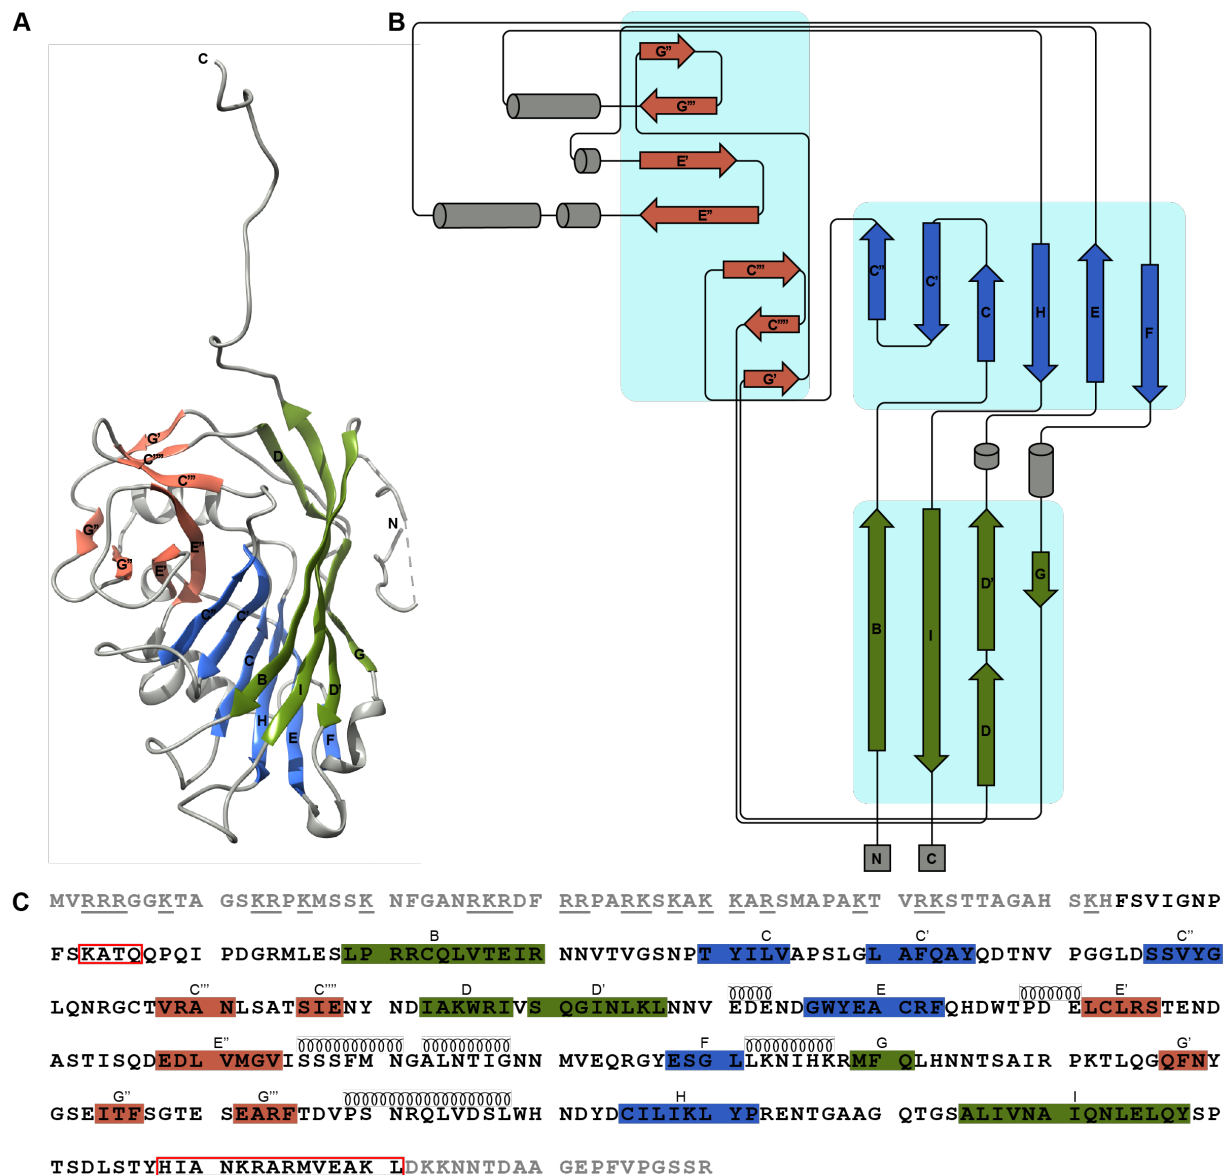

160  
 161 **Figure 2. Capsid protein topology and structural organisation.** The  $\beta$ -strands are coloured  
 162 according which  $\beta$ -sheet they belong to. The  $\beta$ -strands within the green and blue  $\beta$ -sheets are named  
 163 alphabetically according to the conventional jelly-roll fold nomenclature (B to I) (A) The secondary  
 164 structure of subunit A. (B) Schematic diagram of the secondary structure. (C) The amino acid  
 165 sequence of the CtenDNAV-II capsid protein, starting from residue 1. Each line has 70 residues and is  
 166 further subdivided into blocks of 10 residues by spaces within the sequence. The residue numbering is  
 167 the same as in PDB entry 7NS0. Modelled and unmodelled residues are coloured black and grey,  
 168 respectively. Residues highlighted with red rectangles were unmodelled in one of the subunits: F73-  
 169 P76 in subunit A and H358-L371 in subunit C. The assigned secondary structure is shown  
 170 schematically above the sequence. The underlined residues in the unmodelled N-terminus indicate  
 171 positively charged residues.  
 172

### 173 Capsid proteins from CtenDNAV-II and ssRNA viruses are similar

174 Previous structures of so-called CRESS DNA viruses (phylum *Cressnaviricota*) (Krupovic et al.,  
 175 2020) include viruses from families *Ciroviridae* (eg. 3R0R and 5ZJU) and *Geminiviridae* (eg.6F2S  
 176 and 6EK5). The capsid proteins in viruses from these two families also contain a jelly-roll domain, but  
 177 lack the third surface-exposed  $\beta$ -sheet and N-terminal tail found in CtenDNAV-II. A search with the



178 DALI program (Holm, 2020a) revealed that the CtenDNAV-II capsid protein is more similar to capsid  
 179 proteins of ssRNA viruses than to ssDNA viruses (Fig. 3A), corroborating the previous HGT theory  
 180 by Kazlauskas *et al* (Kazlauskas et al., 2017). The closest ssDNA virus is that of Beak and feather  
 181 disease virus (*Circoviridae*), which ends up on 11th place (z-score 8.4) behind ten RNA viruses.  
 182 Highest similarity is found between ssRNA viruses from families *Carmotetraviridae*,  
 183 *Alphatetraviridae* and *Nodaviridae* that resulted in z-scores of 14.4-15.1 (Fig. 3A). For interpretation  
 184 of the results from DALI see Holm (2020) (Holm, 2020b). Superimpositions between capsid proteins  
 185 from CtenDNAV-II and representatives from each family show that those RNA viruses with highest z-  
 186 score all have surface projections in addition to the jelly-roll, albeit with different folds, that occupy  
 187 similar positions as the third  $\beta$ -sheet of CtenDNAV-II (Fig. 3B). However, in none of the other viruses  
 188 the projection is as intertwined with the jelly-roll as for CtenDNAV-II, and instead the protrusion  
 189 often forms a separate domain with a linker region, such as the Immunoglobulin (Ig)-like domain of  
 190 Providence virus (*Carmotetraviridae*) (left most panel in Figure 3B) (Speir et al., 2010). The C-  
 191 terminal surface protruding tail in subunit A and B of CtenDNAV-II is a unique feature that is not  
 192 observed in any of the other virus families (Fig. 3B).

193 In addition to the C-terminal tail and  $\beta$ -sheet surface projection, superimpositions performed by the  
 194 DALI server also revealed non-conserved loops (HI and C'C'') from the jelly-roll (Supplementary  
 195 Fig. 5A, B). These areas are all located on the capsid surface clustered together around the five- and  
 196 three-fold axes (Supplementary Fig. 5C).  
 197

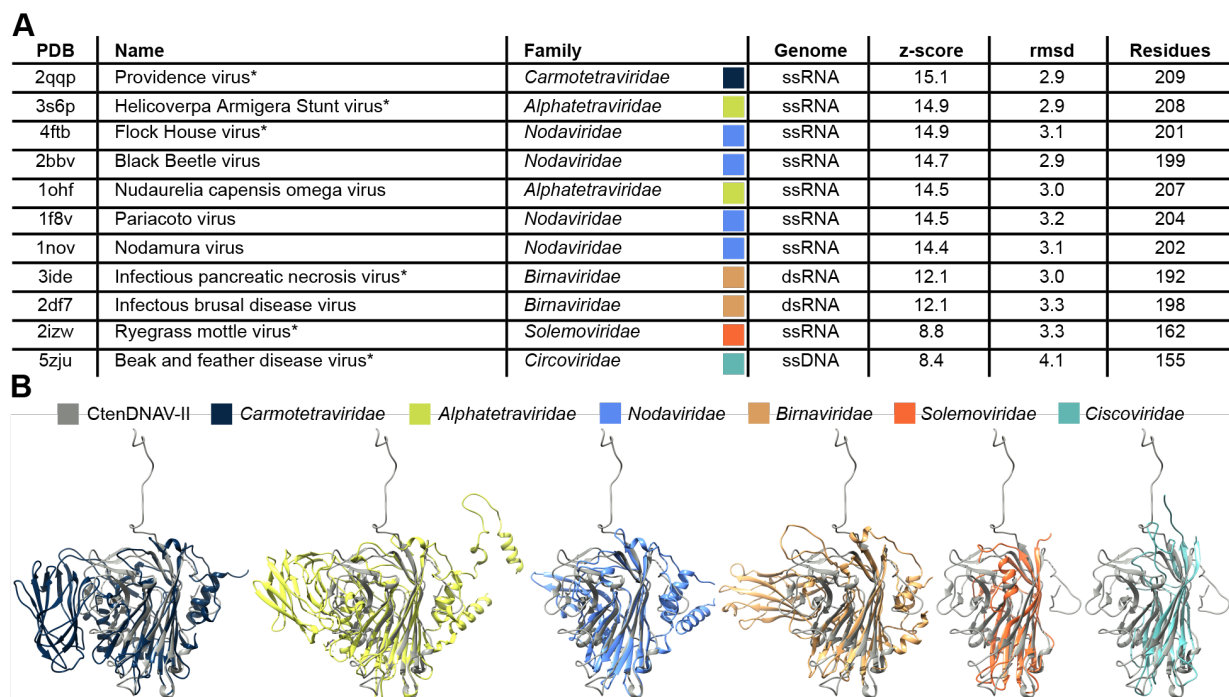

198  
 199 **Figure 3. Structural comparison of the CtenDNAV-II capsid protein with corresponding**  
 200 **proteins from other viruses.** (A) DALI-based structural comparison where the top 11 unique viruses  
 201 (i.e., not unique PDB entries) with highest z-score are listed. Viruses indicated with \* were used for  
 202 the superimpositions in (B). For each comparison the z-score, rmsd and the number of residues that  
 203 were used for the alignment are listed. (B) Superimpositions of the CtenDNAV-II capsid protein  
 204 (gray) with representatives from each family listed in (A).  
 205

## 206 **Intraspecies sequence variability in surface-exposed regions**

207 Since the presented structure is the first of a virus from the *Bacilladnaviridae* family and its most  
208 structurally close-related viruses are ssRNA viruses (Fig. 3), we sequenced (see Supplementary  
209 methods) 15 CtenDNAV-II strains with the anticipation of improving our understanding of the  
210 structure. The alignment (Supplementary Fig. 6) revealed 11 areas with mutations, of which 9 are  
211 surface-exposed primarily on the C-terminal tail (R365, V367, A380 and R390) or beta-sheet  
212 projection (A211-T213, T285 and S291) (Fig. 4). Thus, the mutated areas correlate with the unique  
213 structural features for the CtenDNAV-II capsid protein that was identified from the superimpositions  
214 with the structurally closely related viruses (Fig. 3B and Supplementary Fig. 5A). Interestingly, two  
215 strains, 2-6\_11V10 and 2-6\_11V04, shared the same C-terminus sequence, which were completely  
216 different from the other 13 strains (Fig. 4 and Supplementary Fig. 6).  
217

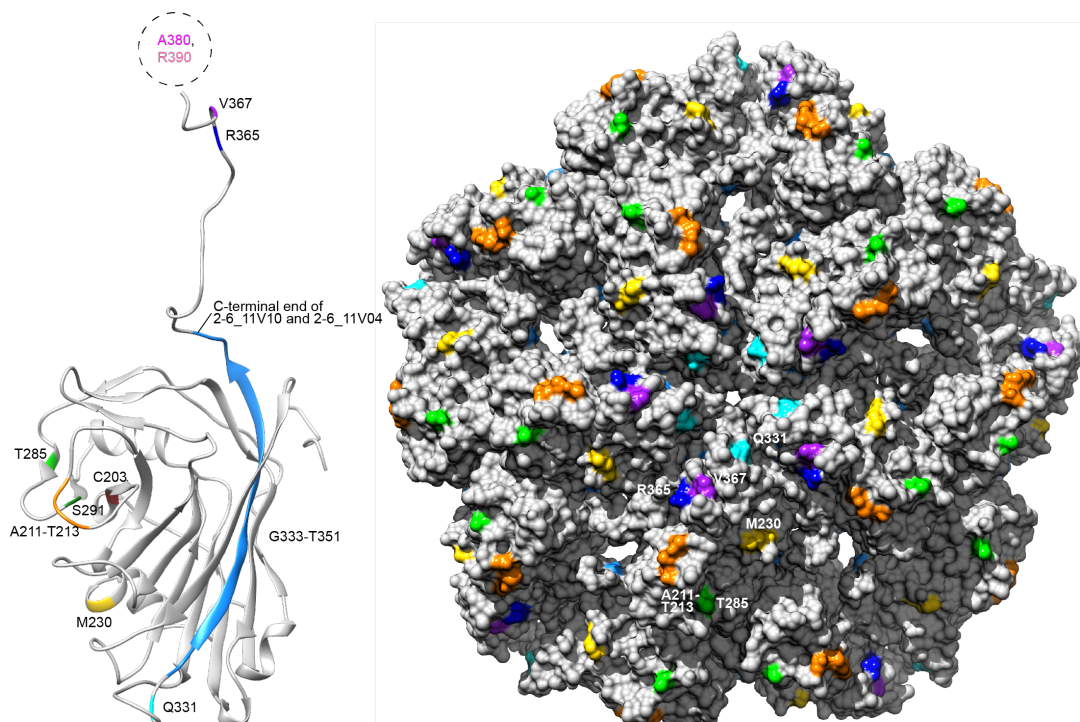

218  
219 **Figure 4. Location of mutations identified among CtenDNAV-II strains.** Subunit A (left), and a  
220 pentamer viewed from the outside looking down the five-fold axis (right) with mutations having the  
221 same colour code as in Supplementary Figure 6. Two mutations (A380 and R390), in dashed circle,  
222 are located in the unmodelled region of the C-terminus.  
223

## 224 ***Chaetoceros tenuissimus* viruses employ different transmission strategies**

225 Sialic acids, acidic sugars that terminate glycan chains on the cell surface, are one of the common viral  
226 receptors, and well-described for vertebrate viruses such as influenza, corona and polyoma. The  
227 existence of sialic acids in algae and the discussions on their importance for algae virus interactions is  
228 however more recent (Fulton et al., 2014; Munke et al., 2020; Wagstaff et al., 2018). Wagstaff and co-  
229 workers could demonstrate that *Prymnesium parvum* is capable of *de novo* synthesis of the deaminated  
230 sialic acid Kdn, and through bioinformatics analysis, that sialic acid biosynthesis is widespread among  
231 microalgae. However, we failed to detect homologous sequences in *C. tenuissimus* (Accession  
232 numbers BLLK01000001-BLLK01000085) for any of the synthesases identified in Wagstaff *et al.* To  
233 further corroborate our findings, we performed a classical hemagglutination inhibition (HI) assay (see  
234 Supplementary methods) to investigate the sialic acid-binding capability of CtenDNAV-II. An RNA  
235 virus (CtenRNAV-II) (family *Marnaviridae*) that infects the same diatom host was also tested as a

236 representative of another major group of diatom viruses. The HI test demonstrated that CtenRNAV-II  
237 shows partial HI activity, especially at high concentrations (no and 2 times dilution), while  
238 CtenDNAV-II did not show any HI activity (Supplementary Fig. 6). In conclusion, both the synthesase  
239 sequence analysis and HI assay indicate that the transmission of CtenDNAV-II is not sialic acid-  
240 mediated.

### 241 ***Chaetoceros tenuissimus* viruses display different host cell affinities**

242 The adsorption kinetics of CtenDNAV-II and CtenRNAV-II were examined with two diatom species  
243 including three culture strains (see Supplementary methods). The adsorption of CtenDNAV-II was not  
244 detected for *Chaetoceros socialis* f. *radians* NIES-3713 (Supplementary Fig. 8). This result is  
245 reasonable, since the DNA virus does not lyse *C. socialis* (Kimura and Tomaru 2015). Although  
246 CtenDNAV-II lyses both *C. tenuissimus* strains NIES-3714 and NIES -3715 (Kimura and Tomaru  
247 2015), significant adsorption of the virus was only observed with the former strain (Supplementary  
248 Fig. 8). As for CtenRNAV-II, significant adsorption was detected for *C. tenuissimus* strain NIES-  
249 3715, but not to other diatom species and strains (Supplementary Fig. 8). A previous study reported  
250 that CtenRNAV-II lyses *C. tenuissimus* strain NIES-3715, but not NIES-3714, and has a low lytic  
251 activity on *C. socialis* f. *radians* (Kimura and Tomaru 2015). Therefore, the present result would be  
252 consistent with the phenotypic relationship and suggest that the specific adsorption of CtenRNAV-II is  
253 determined at host strain level. In conclusion, the degree of the virus and diatom host cell affinities  
254 would be determined by combinations of the virus species and host strain level.

### 255 **CtenDNAV-II genome structure is partially spooled**

256 The genome organization of CtenDNAV-II is shown in Figure 5. The CtenDNAV-II genome consists  
257 of an ordered outer layer (Fig. 5B and E) that is partially spooled around a disordered core (Fig. 5C).  
258 The outer layer (EMDB-12555) was reconstructed at 13 Å by masking out the capsid, while the core  
259 (EMDB-12556) was reconstructed at 23 Å by using a spherical mask (see Materials and Methods for  
260 details). The reconstruction of the outer genome layer displays a coil of three turns that are positioned  
261 between the icosahedral 5-fold axes (Fig. 5E). On each side of the three turns are additional DNA  
262 fragments that do not follow the same spooling arrangement (Fig. 5B). The spooled genome  
263 packaging has previously only been described in viruses with double stranded genomes (Ilca et al.,  
264 2019; Liu et al., 2019), whereas ssRNA viruses instead have a branched network formed by the  
265 genome secondary structure (Dai et al., 2017; Gorzelnik et al., 2016; Koning et al., 2016). The  
266 distance between the parallel turns are about 28 Å (Fig. 5E), which is about the same distance as what  
267 has been described for dsRNA viruses (Ilca et al., 2019). Below each icosahedral 5-fold axis of the  
268 capsid the reconstruction of the outer genome layer displays protrusions towards the capsid (Fig. 5B  
269 and E). However, these protrusions are not necessarily true at every position and could partially be  
270 artefacts from the reconstruction, which is supported by the fact that some of the protrusions loose  
271 connections to the remaining outer layer when the contour level is decreased while other protrusions  
272 remain intact. Connections between the outer genome layer and the core seem to be confined to two  
273 specific areas on opposite sides of the outer layer (Supplementary Fig. 9). Supplementary Movie 1  
274 shows the asymmetric reconstruction in relation to the capsid.

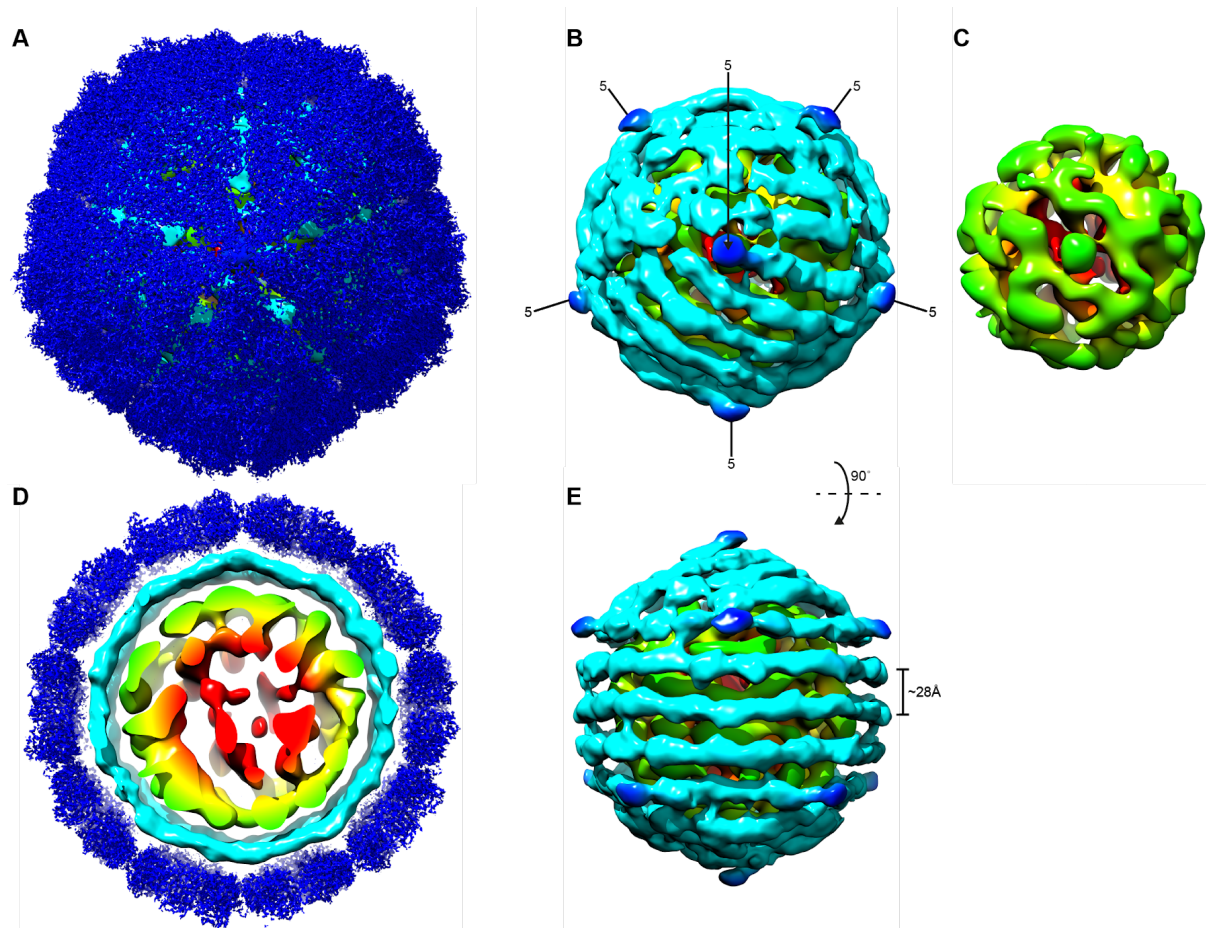

275

276

277

278

279

280

281

282

283

**Figure 5. Asymmetric reconstructions of CtenDNAV-II radially coloured from red to blue. (A)** The capsid (blue) reconstructed with icosahedral symmetry and the asymmetric reconstructions sighted below viewed down the icosahedral five-fold axis. **(B)** Same view as (A) but with the icosahedral reconstruction removed. A protrusion (blue) from the outer genome layer (cyan) is visualised at each five-fold axis (labelled as 5). **(C)** Same view as in (A) and (B) but with the icosahedral and outer layer reconstructions removed. **(D)** A thin slice of the reconstructions shown in (A). **(E)** The picture in (B) has been rotated 90°. The resolution (FSC=0.143) of the outer layer and core are 13 Å and 23 Å, respectively. The FSC curves are shown in Supplementary Figure 2.

## 284 Discussion

### 285 Transmission mechanisms of *Chaetoceros tenuissimus* viruses

286 This paper describes the first structure (Figs. 1-2) of a *Bacilladnaviridae* virus, which is one of the  
287 major groups of marine bloom-forming algae viruses. The CtenDNAV-II capsid protein contains the  
288 widespread virus fold, the jelly-roll, but has in addition a third  $\beta$ -sheet and a C-terminal extension,  
289 both of which form surface domains in close proximity to each other (Supplementary Fig.5) on the  
290 capsid surface and that to our knowledge are unprecedented in other jelly-roll fold viruses determined  
291 to date (Fig. 3, Supplementary Figs. S2 and S5). We have previously determined the structure of a  
292 *C. tenuissimus* infecting RNA virus (family *Marnaviridae*), which has a primordial surface loop and  
293 lacks the receptor-binding motif found in other structurally and phylogenetically related animal  
294 viruses (Munke et al., 2020). This implies that these host-specific algae viruses have unique receptor-  
295 binding mechanisms. The molecular details on the infection mechanisms of diatom viruses are  
296 unknown. However, a putative transmission route could exist through interactions with host sialic  
297 acids, since sialic acid biosynthesis has been shown to be widespread among microalgae (Wagstaff et  
298 al., 2018). In addition, many structurally related jelly-fold viruses interact with sialic acids for cell  
299 entry, such as polyomaviruses via their conserved surface loops (Ströh et al., 2020). Likewise, the  
300 C-terminal P-domain of the betanodavirus capsid protein interacts with sialic acids, and its deletion  
301 affects virulence and host specificity (Liu et al., 2005; Moreno et al., 2019). The combined results of  
302 no homologous sequences in *C. tenuissimus* for any of the synthesases identified in Wagstaff *et al*  
303 (Wagstaff et al., 2018), with the lack of HI activity (Supplementary Fig. 6), strongly refute a sialic  
304 acid interaction between CtenDNAV-II and its host. This implies that the CtenDNAV-II virus  
305 employs an alternative receptor and transmission strategy. The RNA virus infecting the same diatom  
306 host (CtenRNAV-II) did however interact weakly with the mammalian sialic acid, which could  
307 indicate that microalgae might have sialic acids or structurally related acidic sugars that have not yet  
308 been described in the literature. The CtenRNAV-II virus is phylogenetically closely related to  
309 *Picornaviridae* viruses, some of which use sialic acids as their entry receptor (Zocher et al., 2014).  
310 The different receptor-binding strategies employed by the DNA and RNA virus could explain their  
311 different host cell affinities (Supplementary Fig. 8).

312 Nevertheless, the CtenDNAV-II capsid protein has two unique surface features, the C-terminal tail  
313 and  $\beta$ -sheet projection, compared to the most structurally close-related viruses (Fig. 3). These  
314 extensions from the jelly-roll fold were in addition found to have an increasing number of mutations  
315 between different virus species compared to other parts of the structure (Fig. 4 and Supplementary Fig.  
316 6). Host specificity of algae viruses have previously been correlated with surface-exposed amino acid  
317 substitutions (Nagasaki et al., 2005). Future research on CtenDNAV-II strains and their infection  
318 patterns might reveal similar relationships. The locations of the mutations do however make the  $\beta$ -  
319 sheet and C-terminal extensions putative interaction candidates.

### 320 Structural insights on eukaryotic jelly-roll fold viruses in evolution

321 About 30% of all viruses adopt the single jelly-roll fold (Krupovic and Koonin, 2017), and the results  
322 presented herein provide structural insights on the evolution of this fold. Our findings corroborate the  
323 theory that the jelly-roll capsid proteins of ssDNA, ssRNA and dsRNA viruses originate from the  
324 same virus with a primordial jelly-roll fold (Fig. 3) (Kazlauskas et al., 2017; Krupovic and Koonin,  
325 2017). According to the HGT theory, the capsid protein of CRESS-DNA viruses could have been  
326 acquired from the ssRNA protist viruses in early evolutionary events (Kazlauskas et al., 2019, 2017).  
327 Indeed, the capsid protein of CtenDNAV-II is structurally more similar to ssRNA and dsRNA viruses  
328 than to other CRESS-DNA viruses (Fig. 3). Because the rolling-circle replication proteins of CRESS-  
329 DNA viruses are polyphyletic, the capsid protein genes have probably been acquired from ssRNA

330 viruses on several independent occasions and at different time-points in evolution (Krupovic, 2013).  
 331 Similarly, icosahedral dsRNA viruses are thought to have originated from ancestral ssRNA  
 332 nodaviruses and tetraviruses (Coulibaly et al., 2005). Yet another example includes the large CRESS-  
 333 DNA virus FLiP (Flavobacterium-infecting, lipid-containing phage) that shows a dsDNA adenovirus-  
 334 like capsid structure (Laanto et al., 2017), which potentially links CRESS-DNA and dsDNA viruses.  
 335 To put our new structural insights into a broader context, we have updated the putative emergence of  
 336 the ssDNA, ssRNA and dsRNA viruses (Fig. 6).  
 337

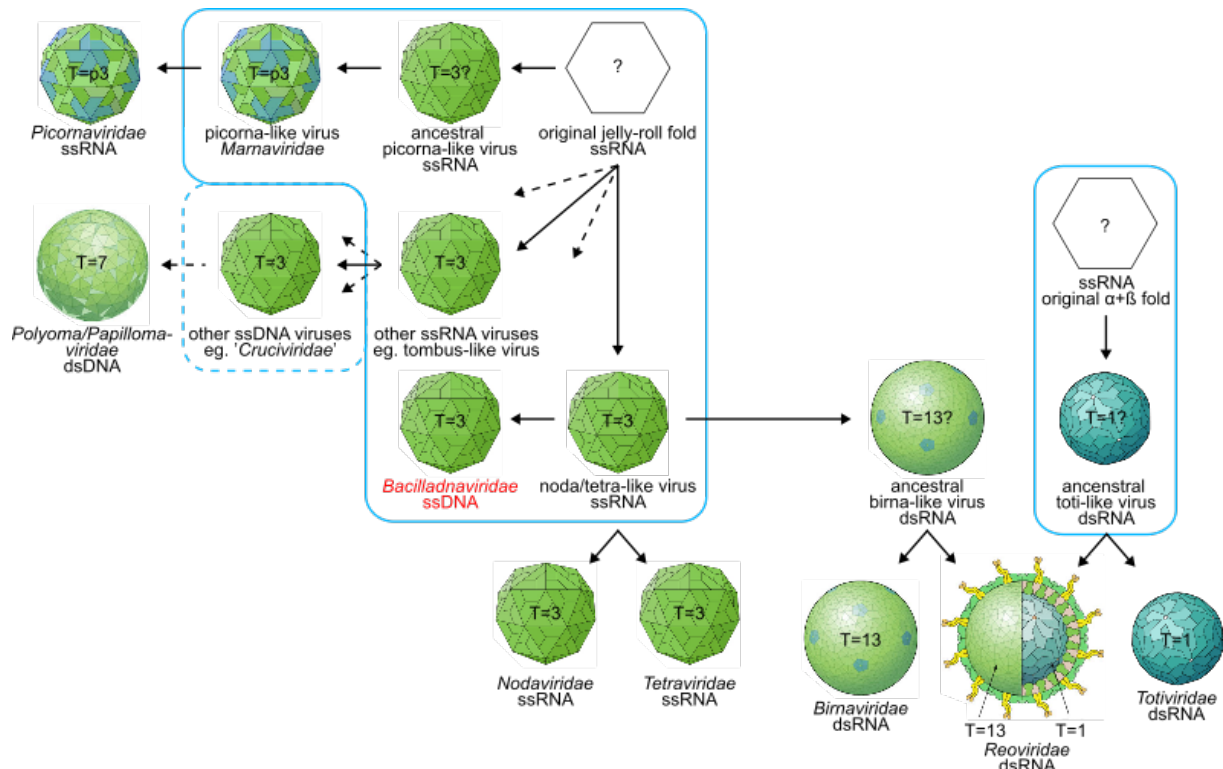

338  
 339 **Figure 6. A scheme depicting the putative emergence of virus capsids carrying different nucleic**  
 340 **acid genomes.** The figure illustrates based on current knowledge the most relevant virus groups and  
 341 the evolutionary relationship between their virus capsids. Events that likely took place at an early  
 342 stage of evolution in ancient algal pools are circled in blue. The dashed blue line represents that  
 343 ssRNA and ssDNA virus recombination has occurred at several independent occasions, at different  
 344 time points in evolution. The figure is based on results described in this paper as well as previous  
 345 results and discussions (Chiba et al., 2020; Coulibaly et al., 2005; Diemer and Stedman, 2012;  
 346 Kazlauskas et al., 2019; Krupovic, 2013; Munke et al., 2020; Okamoto et al., 2020, 2016). The virion  
 347 pictures were derived from ViralZone, SIB Swiss Institute of Bioinformatics (Hulo et al., 2011)  
 348 (<https://viralzone.expasy.org/>) licensed under a Creative Commons Attribution 4.0 International  
 349 Licens.

350  
 351  
 352 Animal and plant ssRNA, dsRNA and CRESS-DNA viruses with icosahedral capsids that contain the  
 353 jelly-roll fold should have acquired additional structural motifs for infecting their hosts. The  
 354 primordial jelly-roll capsid protein structure of the CtenDNAV-II highlights the acquired features of  
 355 these viruses that infect multicellular eukaryotes. Examples of such acquisitions are the Ig-like domain  
 356 of tetraviruses and the P-domain of nodaviruses and birnaviruses (Fig. 3). These structures have been  
 357 described as putative receptor-binding domains of those viruses; however, an exhaustive  
 358 characterization still remains. The external Ig-like domain in tetraviruses (family *Carmotetraviridae*

359 and *Alphatetraviridae*) is believed to function in receptor binding to host cells (Helgstrand et al., 2004;  
360 Penkler et al., 2016). Some *Nodaviridae* viruses, so-called gammanodaviruses, have an external P-  
361 domain that is important for virus attachment and entry (Ho et al., 2018), whereas the capsid proteins  
362 of other nodaviruses retain primordial features that are structurally much more similar to the  
363 CtenDNAV-II capsid (Johnson et al., 2001) (Fig. 3). The dsRNA *Birnaviridae* viruses display an  
364 external highly antigenic P-domain that is likely involved in the initial attachment to the host cells  
365 (Coulibaly et al., 2005; Garriga et al., 2006). The CRESS-DNA polyomaviruses possess a conserved  
366 jelly-roll fold VP1 protein, and has acquired extra minor proteins VP2 and VP3 that has an ER-to-  
367 cytosol penetration function during cell entry (Inoue and Tsai, 2011). Several studies report on the  
368 presence of a large number of diverse unclassified animal CRESS-DNA viruses, including putative  
369 human pathogenic viruses (Ng et al., 2015; Phan et al., 2015; Tisza et al., 2020). Structural  
370 comparison of their capsid proteins with that of CtenDNAV-II could reveal the acquired features of  
371 these animal CRESS-DNA viruses.

### 372 **A spooled genome requires structural adaptations of the capsid**

373 The technological and computational improvements in cryo-EM structure determination have led to an  
374 increasing number of virus genome structures during the last decade. However, determining the  
375 genome structure within the symmetric icosahedral capsid still remains challenging, especially for  
376 single-stranded genomes (Koning et al., 2016). By employing a previously described method of  
377 subtracting the contribution of the capsid (Ilca et al., 2019), we were here able to demonstrate the first  
378 entire genome structure of a ssDNA virus (Fig. 5 and Supplementary Movie 1).

379 Previous cryo-EM studies have revealed three types of genome organization for non-enveloped  
380 icosahedral viruses. The dsDNA and some dsRNA viruses such as Bacteriophage  $\Phi 6$  forms spooled  
381 genome structures with certain interfilament spacing (Ilca et al., 2019; Liu et al., 2019; Wang et al.,  
382 2019). Segmented dsRNA reoviruses instead form non-spooled or partially-spooled genomes with  
383 pseudo-D3 symmetry that interact with the RNA-dependent RNA polymerase (RdRp) (Ding et al.,  
384 2019; Liu and Cheng, 2015; Wang et al., 2018; Zhang et al., 2015). The third variant is found in  
385 *Leviviridae* viruses where the secondary structure of their ssRNA genomes form a branched network  
386 of stem-loops (Dai et al., 2017; Gorzelnik et al., 2016; Koning et al., 2016), however it remains  
387 unknown if a similar organisation is found in other ssRNA viruses.

388 The structure presented here is the first entire genome structure for a ssDNA virus. The genomes of  
389 ssDNA viruses have the capability to form biologically functional secondary structures similar to  
390 ssRNA viruses (Muhire et al., 2014) and since the capsid gene of bacilladnaviruses has been  
391 horizontally transferred from ssRNA viruses, a similar branched structural network is imaginable also  
392 for ssDNA viruses. However, the structure of the CtenDNAV-II genome is much more similar to those  
393 of the spooled dsDNA or the partially spooled dsRNA genomes (Fig. 5 and Supplementary Movie 1).  
394 Two major questions arise for the genome packaging of bacilladnaviruses. The first question is how to  
395 stabilize the spooled ssDNA genome without a secondary structure organization? Potentially, a partial  
396 secondary structure might exist, and could together with the dsDNA segment that exist in  
397 bacilladnaviruses (Kimura and Tomaru, 2015; Tomaru et al., 2011, 2013), be sufficient for stabilizing  
398 the ssDNA genome inside the capsid. Another possibility is that the dsDNA gene of bacilladnaviruses  
399 help stabilizing the ssDNA without having any secondary structure. The second question is how the  
400 ssRNA virus-like capsid protein was adapted to packing the dsDNA/dsRNA-like spooled genome of  
401 the CtenDNAV-II? The spooled genome structures of the dsDNA and dsRNA viruses are packaged by  
402 flexible interactions between the capsid protein and the genome. The interactions are mediated by  
403 small contacts with hydrophobic and/or positively-charged amino acid residues of their capsid proteins  
404 (Ding et al., 2019; Ilca et al., 2019; Liu and Cheng, 2015, 2015; Wang et al., 2019, 2018; Zhang et al.,  
405 2015). In contrast, the secondary structure of the (+)ssRNA viral genome binds specifically to the

406 capsid (Dai et al., 2017; Gorzelnik et al., 2016; Hesketh et al., 2018; Koning et al., 2016). Our  
407 hypothesis is that the unmodelled N-terminus, and possibly the C-terminus of the C-subunit, which  
408 both possess numerous positively charged amino acids, interact with the ssDNA genome, in a flexible  
409 and non-specific manner similar to dsDNA and dsRNA viruses. In contrary, the structurally related  
410 tetra- and nodaviruses seem to interact more specifically with their ssRNA genome, since small RNA  
411 segments (Speir et al., 2010) or parts of the genome (Johnson et al., 2001) have been revealed even  
412 when the icosahedral symmetry has not been broken during the structure determination. This could  
413 explain why the comparison between CtenDNAV-II and the RNA viruses revealed different structural  
414 features of their capsids' interior, where the CtenDNAV-II was unmodelled and the ssRNA viruses  
415 had additional  $\alpha$ -helices (Fig. 3). A 7 nucleotide-stem loop gene fragment of the ssDNA geminivirus  
416 has been reported to interact with its capsid (Hesketh et al., 2018), which could indicate that not all  
417 ssDNA genomes are spooled.

418 The spooling genome structure is efficient for packaging long genomes of dsRNA and dsDNA  
419 viruses (Ilca et al., 2019; Liu and Cheng, 2015). The acquisition of the T=3 capsid gene from a ssRNA  
420 virus could facilitate the packaging of a larger CRESS-DNA genome that cannot be accommodated by  
421 capsids of small T=1 CRESS-DNA viruses (Kazlauskas et al., 2017). Many other ssDNA and dsDNA  
422 viruses such as animal tumor polyomaviruses and papillomaviruses, and plant geminiviruses are  
423 thought to be originated from primordial CRESS-DNA viruses (Kazlauskas et al., 2017; Koonin et al.,  
424 2015; Koonin and Dolja, 2014). Considering the polyphyletic origin of ssDNA viruses and their  
425 acquisitions of different RNA capsid proteins during the course of evolution, it will be interesting  
426 when future ssDNA virus structures are unravelled.



## 427 **Materials and methods**

### 428 **Virus production and purification**

429 CtenDNAV-II was produced as previously described (Kimura and Tomaru, 2015). The crude virus  
430 suspension was loaded onto 15 to 50% (w/v) sucrose density gradients and centrifuged at 24,000  
431  $\times rpm$  ( $102,170 \times g$ ) for 18 h at 4°C (Sw40Ti rotor, Beckman Coulter). The fractions of the sucrose  
432 gradient were applied to SDS-PAGE. The VP2 capsid protein fractions were pooled and subjected to  
433 centrifugation at 28,000 rpm ( $139,065 \times g$ ) for 3 h at 4°C (Sw40Ti rotor, Beckman Coulter). The pellet  
434 was resuspended in 50 mM Tris (pH 7.4), 100 mM NaCl, and 0.1 mM EDTA.

### 435 **Cryo-EM and data collection**

436 An aliquot (3  $\mu$ l) of purified CtenDNAV-II virions ( $10 \text{ mg ml}^{-1}$ ) was deposited onto freshly glow-  
437 discharged holey carbon-coated copper grids (Quantifoil R 2/2, 300 mesh, copper) followed by 2 s of  
438 blotting in 100% relative humidity for plunge-freezing (Vitrobot Mark IV) in liquid ethane. Images  
439 were acquired using a Titan Krios microscope (Thermo Fisher Scientific) operated at 300 kV and  
440 equipped with a K2 Summit direct electron detector (Gatan) and an energy filter.

### 441 **Image processing and 3D reconstruction**

442 The micrographs were corrected for beam-induced drift using MotionCor2 1.2.6 (Zheng et al., 2017),  
443 and contrast transfer function (CTF) parameters were estimated using Gctf 1.06 (Zhang, 2016). The  
444 RELION 3.1 package (Zivanov et al., 2018) was used for particle picking, 2D and 3D classifications,  
445 *de novo* 3D model generation and refinement. A reconstruction of the capsid was generated in I4  
446 symmetry using 33,507 particles, which were obtained by performing 9 consecutive 2D classification  
447 steps. The two genome reconstructions were generated in C1 symmetry using 21,559 particles, which  
448 were generated by performing 6 consecutive 3D classifications of the 33,507 particles that were  
449 obtained from the 2D classification step. Resolutions were estimated using the gold standard Fourier  
450 shell correlation (threshold, 0.143 criterion) (Henderson et al., 2012; Scheres and Chen, 2012). The  
451 data set and image processing are summarized in Table 1.

452 To reconstruct the genome without icosahedral symmetry a similar procedure to what has been  
453 described by Ilca et al (Ilca et al., 2019) was carried out. The contribution of the capsid was first  
454 subtracted from the map created during the final iteration of the I4 refinement job using the Particle  
455 subtraction function in Relion. To create a mask for the particle subtraction, the capsid model was first  
456 transformed to a density map using the molmap command in Chimera and then an inverted soft edged  
457 mask was created from the density map using relion\_mask\_create with the --invert option. The  
458 subtraction was followed by 3D classification (C1 symmetry), which generated the subset of 21,559  
459 particles that was used for the final C1 refinement. The 3D classifications revealed clear density of an  
460 outer layer, and an additional subtraction was therefore performed using a spherical mask of 100 Å  
461 before the final refinement. The spherical mask was created using relion\_mask\_create with the --  
462 denovo and --outer\_radius options. The two maps (the capsid density created by molmap and the  
463 circular map) were combined using Chimeras vop command before creating a new inverted mask  
464 using relion\_mask\_create, which was used for subtraction before the final 3D refinement. To  
465 reconstruct the core alone the spherical mask was used for the subtraction procedure.

### 466 **Model building and refinement**

467 The atomic model of CtenDNAV-II capsid protein was manually built into the density map using Coot  
468 (Emsley and Cowtan, 2004). The model was further improved through cycles of real-space refinement  
469 in PHENIX (Adams et al., 2010) with geometric and secondary structure restraints, and subsequent  
470 manual corrections by Coot were carried out iteratively. Refinement statistics are summarized in  
471 Table 1. Figures were generated using the programs UCSF Chimera (Pettersen et al., 2004) and UCSF

472 Chimera X (Goddard et al., 2018). Structural comparison of the CtenDNAV-II capsid protein was  
473 carried out by the DALI server as a heuristic search against all structures (as of 2020-06-03) in the  
474 PDB (Holm, 2020a).

475 **Data availability**

476 The atomic coordinates of CtenDNAV-II have been submitted to the Protein Data Bank under  
477 accession no. 7NS0. The cryo-EM density maps of the CtenDNAV-II capsid and genome has been  
478 deposited at the Electron Microscopy Data Bank under no. EMD-12554, 12555 and 12556,  
479 respectively.

## 480 **Acknowledgements**

481 The data were collected at the Cryo-EM Swedish National Facility funded by the Knut and Alice  
482 Wallenberg, Erling Persson Family, and Kempe Foundations, SciLifeLab, Stockholm University and  
483 Umeå University. We thank Julian Conrad and Dustin Morado for help with data collection. We also  
484 want to thank Afonso Vieira for valuable discussions.

485  
486 Funding was provided by the following agencies: Vetenskapsrådet (VR)/The Swedish Research  
487 Council (to K.O., grant no. 2018-03387), the Swedish Foundation for International Cooperation in  
488 Research and Higher Education (STINT) (to Janos Hajdu and K.O., grant no. JA2014-5721),  
489 FORMAS research grant from the Swedish Research Council for Environment, Agricultural Sciences,  
490 and Spatial Planning (to K.O., grant no. 2018-00421), the Royal Swedish Academy of Sciences (to  
491 K.O., grant no. BS2018-0053), and the Japan Society for the Promotion of Science KAKENHI (to  
492 Keizo Nagasaki, K.K., and Y.T., grant no. 16H06429, 16K21723, 16H06437, and 19H00956).

493  
494 A.M., K.K., Y.T., and K.O. prepared the cryo-EM samples. A.M. and K.O. designed the experiments.  
495 A.M. and K.O. collected the cryo-EM data and analysed the data. H.W performed the HI assay. Y.T.  
496 performed the adsorption test. Y.H., K.Y., S.M. and K.K. performed the sequence analyses. A.M. and  
497 K.O. wrote the manuscript. All of the authors discussed the results and proofread the manuscript.

498  
499 We declare no competing financial interests.

## 500 References

- 501 Adams PD, Afonine PV, Bunkóczi G, Chen VB, Davis IW, Echols N, Headd JJ, Hung L-W, Kapral  
502 GJ, Grosse-Kunstleve RW, McCoy AJ, Moriarty NW, Oeffner R, Read RJ, Richardson DC,  
503 Richardson JS, Terwilliger TC, Zwart PH. 2010. *PHENIX*: a comprehensive Python-based system for  
504 macromolecular structure solution. *Acta Crystallogr D Biol Crystallogr* **66**:213–221.  
505 doi:10.1107/S0907444909052925
- 506 Bratbak G, Egge JK, Heldal M. 1993. Viral mortality of the marine alga *Emiliania huxleyi*  
507 (Haptophyceae) and termination of algal blooms. *Mar Ecol Prog Ser* **93**:39–48.
- 508 Brussaard CPD. 2004. Viral Control of Phytoplankton Populations-a Review1. *J Eukaryot Microbiol*  
509 **51**:125–138. doi:10.1111/j.1550-7408.2004.tb00537.x
- 510 Chiba Y, Tomaru Y, Shimabukuro H, Kimura K, Hirai M, Takaki Y, Hagiwara D, Nunoura T,  
511 Urayama S. 2020. Viral RNA Genomes Identified from Marine Macroalgae and a Diatom. *Microbes*  
512 *Environ* **35**:n/a. doi:10.1264/jsme2.ME20016
- 513 Coulibaly F, Chevalier C, Gutsche I, Pous J, Navaza J, Bressanelli S, Delmas B, Rey FA. 2005. The  
514 Birnavirus Crystal Structure Reveals Structural Relationships among Icosahedral Viruses. *Cell*  
515 **120**:761–772. doi:10.1016/j.cell.2005.01.009
- 516 Dai X, Li Z, Lai M, Shu S, Du Y, Zhou ZH, Sun R. 2017. In situ structures of the genome and  
517 genome-delivery apparatus in a single-stranded RNA virus. *Nature* **541**:112–116.  
518 doi:10.1038/nature20589
- 519 Diemer GS, Stedman KM. 2012. A novel virus genome discovered in an extreme environment  
520 suggests recombination between unrelated groups of RNA and DNA viruses. *Biol Direct* **7**:13.  
521 doi:10.1186/1745-6150-7-13
- 522 Ding K, Celma CC, Zhang X, Chang T, Shen W, Atanasov I, Roy P, Zhou ZH. 2019. In situ structures  
523 of rotavirus polymerase in action and mechanism of mRNA transcription and release. *Nat Commun*  
524 **10**:2216. doi:10.1038/s41467-019-10236-7
- 525 Dolja VV, Koonin EV. 2018. Metagenomics reshapes the concepts of RNA virus evolution by  
526 revealing extensive horizontal virus transfer. *Virus Res* **244**:36–52. doi:10.1016/j.virusres.2017.10.020
- 527 Emsley P, Cowtan K. 2004. *Coot*: model-building tools for molecular graphics. *Acta Crystallogr D*  
528 *Biol Crystallogr* **60**:2126–2132. doi:10.1107/S0907444904019158
- 529 Fuhrman JA. 1999. Marine viruses and their biogeochemical and ecological effects. *Nature* **399**:541–  
530 548. doi:10.1038/21119
- 531 Fulton JM, Fredricks HF, Bidle KD, Vardi A, Kendrick BJ, DiTullio GR, Van Mooy BAS. 2014.  
532 Novel molecular determinants of viral susceptibility and resistance in the lipidome of *Emiliania*  
533 *huxleyi*: Novel lipids in *Emiliania huxleyi*. *Environ Microbiol* **16**:1137–1149. doi:10.1111/1462-  
534 2920.12358
- 535 Garriga D, Querol-Audí J, Abaitua F, Saugar I, Pous J, Verdaguer N, Castón JR, Rodriguez JF. 2006.  
536 The 2.6-Angstrom Structure of Infectious Bursal Disease Virus-Derived T=1 Particles Reveals New  
537 Stabilizing Elements of the Virus Capsid. *J Virol* **80**:6895–6905. doi:10.1128/JVI.00368-06
- 538 Goddard TD, Huang CC, Meng EC, Pettersen EF, Couch GS, Morris JH, Ferrin TE. 2018. UCSF  
539 ChimeraX: Meeting modern challenges in visualization and analysis: UCSF ChimeraX Visualization  
540 System. *Protein Sci* **27**:14–25. doi:10.1002/pro.3235
- 541 Gorzelnik KV, Cui Z, Reed CA, Jakana J, Young R, Zhang J. 2016. Asymmetric cryo-EM structure of  
542 the canonical *Allolevivirus* Q $\beta$  reveals a single maturation protein and the genomic ssRNA in situ.  
543 *Proc Natl Acad Sci* **113**:11519–11524. doi:10.1073/pnas.1609482113
- 544 Harrison SC, Olson AJ, Schutt CE, Winkler FK, Bricogne G. 1978. Tomato bushy stunt virus at 2.9 Å  
545 resolution. *Nature* **276**:368–373. doi:10.1038/276368a0
- 546 Helgstrand C, Munshi S, Johnson JE, Liljas L. 2004. The refined structure of *Nudaurelia capensis*  $\omega$   
547 Virus reveals control elements for a T = 4 capsid maturation. *Virology* **318**:192–203.  
548 doi:10.1016/j.virol.2003.08.045
- 549 Henderson R, Sali A, Baker ML, Carragher B, Devkota B, Downing KH, Egelman EH, Feng Z, Frank  
550 J, Grigorieff N, Jiang W, Ludtke SJ, Medalia O, Penczek PA, Rosenthal PB, Rossmann MG, Schmid  
551 MF, Schröder GF, Steven AC, Stokes DL, Westbrook JD, Wriggers W, Yang H, Young J, Berman  
552 HM, Chiu W, Kleywegt GJ, Lawson CL. 2012. Outcome of the First Electron Microscopy Validation  
553 Task Force Meeting. *Structure* **20**:205–214. doi:10.1016/j.str.2011.12.014

- 554 Hesketh EL, Saunders K, Fisher C, Potze J, Stanley J, Lomonosoff GP, Ranson NA. 2018. The 3.3 Å  
555 structure of a plant geminivirus using cryo-EM. *Nat Commun* **9**:2369. doi:10.1038/s41467-018-04793-  
556 6
- 557 Ho KL, Gabrielsen M, Beh PL, Kueh CL, Thong QX, Streetley J, Tan WS, Bhella D. 2018. Structure  
558 of the *Macrobrachium rosenbergii* nodavirus: A new genus within the Nodaviridae? *PLOS Biol*  
559 **16**:e3000038. doi:10.1371/journal.pbio.3000038
- 560 Holm L. 2020a. DALI and the persistence of protein shape. *Protein Sci* **29**:128–140.  
561 doi:10.1002/pro.3749
- 562 Holm L. 2020b. Using Dali for Protein Structure Comparison In: Gáspári Z, editor. Structural  
563 Bioinformatics, Methods in Molecular Biology. New York, NY: Springer US. pp. 29–42.  
564 doi:10.1007/978-1-0716-0270-6\_3
- 565 Hulo C, de Castro E, Masson P, Bougueleret L, Bairoch A, Xenarios I, Le Mercier P. 2011.  
566 ViralZone: a knowledge resource to understand virus diversity. *Nucleic Acids Res* **39**:D576–D582.  
567 doi:10.1093/nar/gkq901
- 568 Ilca SL, Sun X, El Omari K, Kotecha A, de Haas F, DiMaio F, Grimes JM, Stuart DI, Poranen MM,  
569 Huiskonen JT. 2019. Multiple liquid crystalline geometries of highly compacted nucleic acid in a  
570 dsRNA virus. *Nature* **570**:252–256. doi:10.1038/s41586-019-1229-9
- 571 Inoue T, Tsai B. 2011. A Large and Intact Viral Particle Penetrates the Endoplasmic Reticulum  
572 Membrane to Reach the Cytosol. *PLoS Pathog* **7**:e1002037. doi:10.1371/journal.ppat.1002037
- 573 Johannessen T, Larsen A, Bratbak G, Pagarete A, Edvardsen B, Egge E, Sandaa R-A. 2017. Seasonal  
574 Dynamics of Haptophytes and dsDNA Algal Viruses Suggest Complex Virus-Host Relationship.  
575 *Viruses* **9**:84. doi:10.3390/v9040084
- 576 Johnson JE, Tang L, Johnson KN, Ball LA, Lin T, Yeager M. 2001. The structure of Pariacoto virus  
577 reveals a dodecahedral cage of duplex RNA. *Nat Struct Biol* **8**:77–83. doi:10.1038/83089
- 578 Kazlauskas D, Dayaram A, Kraberger S, Goldstien S, Varsani A, Krupovic M. 2017. Evolutionary  
579 history of ssDNA bacilladnaviruses features horizontal acquisition of the capsid gene from ssRNA  
580 nodaviruses. *Virology* **504**:114–121. doi:10.1016/j.virol.2017.02.001
- 581 Kazlauskas D, Varsani A, Koonin EV, Krupovic M. 2019. Multiple origins of prokaryotic and  
582 eukaryotic single-stranded DNA viruses from bacterial and archaeal plasmids. *Nat Commun* **10**:3425.  
583 doi:10.1038/s41467-019-11433-0
- 584 Kimura K, Tomaru Y. 2015. Discovery of Two Novel Viruses Expands the Diversity of Single-  
585 Stranded DNA and Single-Stranded RNA Viruses Infecting a Cosmopolitan Marine Diatom. *Appl*  
586 *Environ Microbiol* **81**:1120–1131. doi:10.1128/AEM.02380-14
- 587 Koning RI, Gomez-Blanco J, Akopjana I, Vargas J, Kazaks A, Tars K, Carazo JM, Koster AJ. 2016.  
588 Asymmetric cryo-EM reconstruction of phage MS2 reveals genome structure in situ. *Nat Commun*  
589 **7**:12524. doi:10.1038/ncomms12524
- 590 Koonin EV, Dolja VV. 2014. Virus World as an Evolutionary Network of Viruses and Capsidless  
591 Selfish Elements. *Microbiol Mol Biol Rev* **78**:278–303. doi:10.1128/MMBR.00049-13
- 592 Koonin EV, Dolja VV, Krupovic M. 2015. Origins and evolution of viruses of eukaryotes: The  
593 ultimate modularity. *Virology* **479–480**:2–25. doi:10.1016/j.virol.2015.02.039
- 594 Krupovic M. 2013. Networks of evolutionary interactions underlying the polyphyletic origin of  
595 ssDNA viruses. *Curr Opin Virol* **3**:578–586. doi:10.1016/j.coviro.2013.06.010
- 596 Krupovic M, Koonin EV. 2017. Multiple origins of viral capsid proteins from cellular ancestors. *Proc*  
597 *Natl Acad Sci U S A* **114**:E2401–E2410. doi:10.1073/pnas.1621061114
- 598 Krupovic M, Varsani A, Kazlauskas D, Breitbart M, Delwart E, Rosario K, Yutin N, Wolf YI,  
599 Harrach B, Zerbini FM, Dolja VV, Kuhn JH, Koonin EV. 2020. *Cressdnaviricota*: a Virus Phylum  
600 Unifying Seven Families of Rep-Encoding Viruses with Single-Stranded, Circular DNA Genomes. *J*  
601 *Virol* **94**:e00582-20, /jvi/94/12/JVI.00582-20.atom. doi:10.1128/JVI.00582-20
- 602 Kucukelbir A, Sigworth FJ, Tagare HD. 2014. Quantifying the local resolution of cryo-EM density  
603 maps. *Nat Methods* **11**:63–65. doi:10.1038/nmeth.2727
- 604 Laanto E, Mäntynen S, De Colibus L, Marjakangas J, Gillum A, Stuart DI, Ravantti JJ, Huiskonen JT,  
605 Sundberg L-R. 2017. Virus found in a boreal lake links ssDNA and dsDNA viruses. *Proc Natl Acad*  
606 *Sci* **114**:8378–8383. doi:10.1073/pnas.1703834114
- 607 Liu H, Cheng L. 2015. Cryo-EM shows the polymerase structures and a nonspooled genome within a  
608 dsRNA virus. *Science* **349**:1347–1350. doi:10.1126/science.aaa4938

- 609 Liu W, Hsu C-H, Hong Y-R, Wu S-C, Wang C-H, Wu Y-M, Chao C-B, Lin C-S. 2005. Early  
610 endocytosis pathways in SSN-1 cells infected by dragon grouper nervous necrosis virus. *J Gen Virol*  
611 **86**:2553–2561. doi:10.1099/vir.0.81021-0
- 612 Liu Y-T, Jih J, Dai X, Bi G-Q, Zhou ZH. 2019. Cryo-EM structures of herpes simplex virus type 1  
613 portal vertex and packaged genome. *Nature* **570**:257–261. doi:10.1038/s41586-019-1248-6
- 614 Mallery DL, Márquez CL, McEwan WA, Dickson CF, Jacques DA, Anandapadamanaban M, Bichel  
615 K, Towers GJ, Saiardi A, Böcking T, James LC. 2018. IP6 is an HIV pocket factor that prevents  
616 capsid collapse and promotes DNA synthesis. *eLife* **7**. doi:10.7554/eLife.35335
- 617 Moreno P, Souto S, Leiva-Rebollo R, Borrego JJ, Bandín I, Alonso MC. 2019. Capsid amino acids at  
618 positions 247 and 270 are involved in the virulence of betanodaviruses to European sea bass. *Sci Rep*  
619 **9**:14068. doi:10.1038/s41598-019-50622-1
- 620 Muhire BM, Golden M, Murrell B, Lefevre P, Lett J-M, Gray A, Poon AYP, Ngandu NK, Semegni  
621 Y, Tanov EP, Monjane AL, Harkins GW, Varsani A, Shepherd DN, Martin DP. 2014. Evidence of  
622 Pervasive Biologically Functional Secondary Structures within the Genomes of Eukaryotic Single-  
623 Stranded DNA Viruses. *J Virol* **88**:1972–1989. doi:10.1128/JVI.03031-13
- 624 Munke A, Kimura K, Tomaru Y, Okamoto K. 2020. Capsid Structure of a Marine Algal Virus of the  
625 Order *Picornavirales*. *J Virol* **94**:e01855-19. [/jvi/94/9/JVI.01855-19.atom](https://doi.org/10.1128/JVI.01855-19). doi:10.1128/JVI.01855-19
- 626 Nagasaki K, Shirai Y, Takao Y, Mizumoto H, Nishida K, Tomaru Y. 2005. Comparison of genome  
627 sequences of single-stranded RNA viruses infecting the bivalve-killing dinoflagellate *Heterocapsa*  
628 *circularisquama*. *Appl Environ Microbiol* **71**:8888–8894. doi:10.1128/AEM.71.12.8888-8894.2005
- 629 Nagasaki K, Tarutani K, Yamaguchi M. 1999. Growth Characteristics of *Heterosigma*  
630 *akashiwo* Virus and Its Possible Use as a Microbiological Agent for Red Tide Control. *Appl*  
631 *Environ Microbiol* **65**:898.
- 632 Ng TFF, Zhang W, Sachsenröder J, Kondov NO, da Costa AC, Vega E, Holtz LR, Wu G, Wang D,  
633 Stine CO, Antonio M, Mulvaney US, Muench MO, Deng X, Ambert-Balay K, Pothier P, Vinjé J,  
634 Delwart E. 2015. A diverse group of small circular ssDNA viral genomes in human and non-human  
635 primate stools. *Virus Evol* **1**:vev017. doi:10.1093/ve/vev017
- 636 Nishihara T, Kurano N, Shinoda S. 1986. Calculation of Most Probable Number for Enumeration of  
637 Bacteria on a Micro-Computer. *Eisei Kagaku* **32**:226–228. doi:10.1248/jhs1956.32.226
- 638 Okamoto K, Ferreira RJ, Larsson DSD, Maia FRNC, Isawa H, Sawabe K, Murata K, Hajdu J, Iwasaki  
639 K, Kasson PM, Miyazaki N. 2020. Acquired Functional Capsid Structures in Metazoan Totivirus-like  
640 dsRNA Virus. *Structure* **28**:888-896.e3. doi:10.1016/j.str.2020.04.016
- 641 Okamoto K, Miyazaki N, Larsson DSD, Kobayashi D, Svenda M, Mühlig K, Maia FRNC, Gunn LH,  
642 Isawa H, Kobayashi M, Sawabe K, Murata K, Hajdu J. 2016. The infectious particle of insect-borne  
643 totivirus-like Omono River virus has raised ridges and lacks fibre complexes. *Sci Rep* **6**:33170.  
644 doi:10.1038/srep33170
- 645 Penkler DL, Jiwaji M, Domitrovic T, Short JR, Johnson JE, Dorrington RA. 2016. Binding and entry  
646 of a non-enveloped T=4 insect RNA virus is triggered by alkaline pH. *Virology* **498**:277–287.  
647 doi:10.1016/j.virol.2016.08.028
- 648 Pettersen EF, Goddard TD, Huang CC, Couch GS, Greenblatt DM, Meng EC, Ferrin TE. 2004. UCSF  
649 Chimera?A visualization system for exploratory research and analysis. *J Comput Chem* **25**:1605–  
650 1612. doi:10.1002/jcc.20084
- 651 Phan TG, Mori D, Deng X, Rajindrajith S, Ranawaka U, Fan Ng TF, Bucardo-Rivera F, Orlandi P,  
652 Ahmed K, Delwart E. 2015. Small circular single stranded DNA viral genomes in unexplained cases  
653 of human encephalitis, diarrhea, and in untreated sewage. *Virology* **482**:98–104.  
654 doi:10.1016/j.virol.2015.03.011
- 655 Rossmann MG, Arnold E, Erickson JW, Frankenberger EA, Griffith JP, Hecht H-J, Johnson JE,  
656 Kamer G, Luo M, Mosser AG, Rueckert RR, Sherry B, Vriend G. 1985. Structure of a human  
657 common cold virus and functional relationship to other picornaviruses. *Nature* **317**:145–153.  
658 doi:10.1038/317145a0
- 659 Scheres SHW. 2012. RELION: Implementation of a Bayesian approach to cryo-EM structure  
660 determination. *J Struct Biol* **180**:519–530. doi:10.1016/j.jsb.2012.09.006
- 661 Scheres SHW, Chen S. 2012. Prevention of overfitting in cryo-EM structure determination. *Nat*  
662 *Methods* **9**:853–854. doi:10.1038/nmeth.2115

- 663 Speir JA, Taylor DJ, Natarajan P, Pringle FM, Ball LA, Johnson JE. 2010. Evolution in Action: N and  
664 C Termini of Subunits in Related T = 4 Viruses Exchange Roles as Molecular Switches. *Structure*  
665 **18**:700–709. doi:10.1016/j.str.2010.03.010
- 666 Ströh LJ, Rustmeier NH, Blaum BS, Botsch J, Rößler P, Wedekink F, Lipkin WI, Mishra N, Stehle T.  
667 2020. Structural Basis and Evolution of Glycan Receptor Specificities within the Polyomavirus  
668 Family. *mBio* **11**:e00745-20, /mbio/11/4/mBio.00745-20.atom. doi:10.1128/mBio.00745-20
- 669 Suttle CA. 2007. Marine viruses — major players in the global ecosystem. *Nat Rev Microbiol* **5**:801–  
670 812. doi:10.1038/nrmicro1750
- 671 Suttle CA. 1993. Enumeration and isolation of viruses Handbook of Methods in Aquatic Microbial  
672 Ecology. Boca Raton: Lewis Publishers.
- 673 Tarutani K, Nagasaki K, Yamaguchi M. 2006. Virus adsorption process determines virus  
674 susceptibility in *Heterosigma akashiwo* (Raphidophyceae). *Aquat Microb Ecol* **42**:209–213.  
675 doi:10.3354/ame042209
- 676 Tarutani K, Nagasaki K, Yamaguchi M. 2000. Viral Impacts on Total Abundance and Clonal  
677 Composition of the Harmful Bloom-Forming Phytoplankton *Heterosigma akashiwo*. *Appl Environ*  
678 *Microbiol* **66**:4916–4920. doi:10.1128/AEM.66.11.4916-4920.2000
- 679 Tisza MJ, Pastrana DV, Welch NL, Stewart B, Peretti A, Starrett GJ, Pang Y-YS, Krishnamurthy SR,  
680 Pesavento PA, McDermott DH, Murphy PM, Whited JL, Miller B, Brenchley J, Rosshart SP,  
681 Rehmann B, Doorbar J, Ta'ala BA, Pletnikova O, Troncoso JC, Resnick SM, Bolduc B, Sullivan  
682 MB, Varsani A, Segall AM, Buck CB. 2020. Discovery of several thousand highly diverse circular  
683 DNA viruses. *eLife* **9**:e51971. doi:10.7554/eLife.51971
- 684 Tomaru Y, Kimura K. 2016. Rapid quantification of viable cells of the planktonic diatom *Chaetoceros*  
685 *tenuissimus* and associated RNA viruses in culture. *Plankton Benthos Res* **11**:9–16.  
686 doi:10.3800/pbr.11.9
- 687 Tomaru Y, Shirai Y, Toyoda K, Nagasaki K. 2011. Isolation and characterisation of a single-stranded  
688 DNA virus infecting the marine planktonic diatom *Chaetoceros tenuissimus*. *Aquat Microb Ecol*  
689 **64**:175–184. doi:10.3354/ame01517
- 690 Tomaru Y, Toyoda K, Suzuki H, Nagumo T, Kimura K, Takao Y. 2013. New single-stranded DNA  
691 virus with a unique genomic structure that infects marine diatom *Chaetoceros setoensis*. *Sci Rep*  
692 **3**:3337. doi:10.1038/srep03337
- 693 Wagstaff BA, Rejzek M, Field RA. 2018. Identification of a Kdn biosynthesis pathway in the  
694 haptophyte *Prymnesium parvum* suggests widespread sialic acid biosynthesis among microalgae. *J*  
695 *Biol Chem* **293**:16277–16290. doi:10.1074/jbc.RA118.004921
- 696 Wang F, Liu Y, Su Z, Osinski T, de Oliveira GAP, Conway JF, Schouten S, Krupovic M, Prangishvili  
697 D, Egelman EH. 2019. A packing for A-form DNA in an icosahedral virus. *Proc Natl Acad Sci*  
698 **116**:22591–22597. doi:10.1073/pnas.1908242116
- 699 Wang X, Zhang F, Su R, Li X, Chen W, Chen Q, Yang T, Wang J, Liu H, Fang Q, Cheng L. 2018.  
700 Structure of RNA polymerase complex and genome within a dsRNA virus provides insights into the  
701 mechanisms of transcription and assembly. *Proc Natl Acad Sci* **115**:7344–7349.  
702 doi:10.1073/pnas.1803885115
- 703 Wilhelm SW, Suttle CA. 1999. Viruses and Nutrient Cycles in the Sea. *BioScience* **49**:781–788.  
704 doi:10.2307/1313569
- 705 Wolf YI, Silas S, Wang Y, Wu S, Bocek M, Kazlauskas D, Krupovic M, Fire A, Dolja VV, Koonin  
706 EV. 2020. Doubling of the known set of RNA viruses by metagenomic analysis of an aquatic virome.  
707 *Nat Microbiol* **5**:1262–1270. doi:10.1038/s41564-020-0755-4
- 708 Zhang K. 2016. Gctf: Real-time CTF determination and correction. *J Struct Biol* **193**:1–12.  
709 doi:10.1016/j.jsb.2015.11.003
- 710 Zhang X, Ding K, Yu X, Chang W, Sun J, Hong Zhou Z. 2015. In situ structures of the segmented  
711 genome and RNA polymerase complex inside a dsRNA virus. *Nature* **527**:531–534.  
712 doi:10.1038/nature15767
- 713 Zheng SQ, Palovcak E, Armache J-P, Verba KA, Cheng Y, Agard DA. 2017. MotionCor2: anisotropic  
714 correction of beam-induced motion for improved cryo-electron microscopy. *Nat Methods* **14**:331–332.  
715 doi:10.1038/nmeth.4193

716 Zivanov J, Nakane T, Forsberg BO, Kimanius D, Hagen WJ, Lindahl E, Scheres SH. 2018. New tools  
717 for automated high-resolution cryo-EM structure determination in RELION-3. *eLife* 7:e42166.  
718 doi:10.7554/eLife.42166  
719 Zocher G, Mistry N, Frank M, Hähnlein-Schick I, Ekström J-O, Arnberg N, Stehle T. 2014. A Sialic  
720 Acid Binding Site in a Human Picornavirus. *PLoS Pathog* 10:e1004401.  
721 doi:10.1371/journal.ppat.1004401  
722



723 **Supplementary figures**

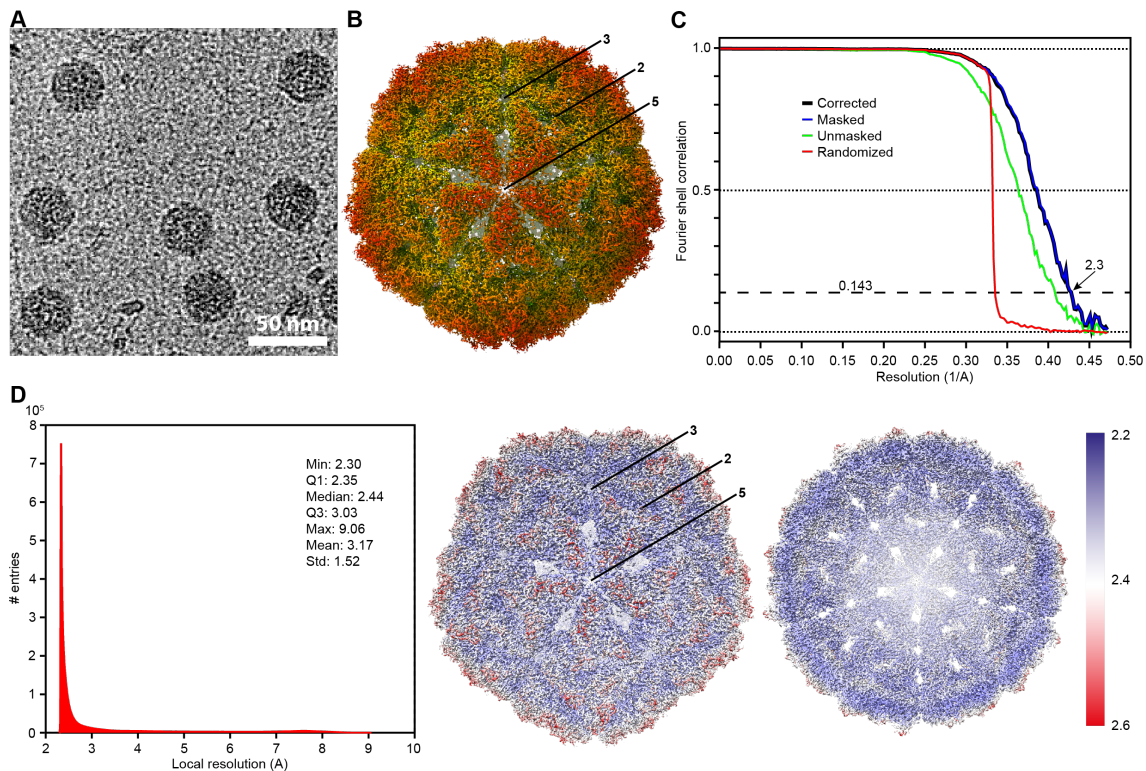

724  
 725 **Supplementary Figure 1. Data collection and reconstruction of the capsid.** (A) Cryo-EM raw  
 726 image of CtenDNAV-II. (B) Cryo-EM 3D reconstruction of the CtenDNAV-II capsid. The capsid is  
 727 viewed down the five-fold axis and radially coloured from blue to red. The icosahedral five-fold,  
 728 three-fold, and two-fold axes are labelled as 5, 3, and 2, respectively. (C) The gold standard FSC  
 729 resolution curves of masked (blue) and unmasked (green) reconstructions of the CtenDNAV-II capsid.  
 730 Possible effects of the masking were compensated for by noise randomization (red), to create the final  
 731 FSC curve (black). The resolution at which the correlation drops below the FSC = 0.143 (gold  
 732 standard threshold (Henderson et al., 2012; Scheres and Chen, 2012)) is 2.3 Å. (D) Local resolution of  
 733 the final reconstruction determined by Relion. The left panel shows a histogram of the local resolution,  
 734 and the middle and right panel shows the reconstruction coloured from red to white to blue that  
 735 corresponds to local resolutions 2.6, 2.4 and 2.2, respectively. The icosahedral five-fold, three-fold,  
 736 and two-fold axes are labelled as 5, 3, and 2, respectively in the middle panel. The front half of the  
 737 reconstruction is removed in the right most panel to visualize the inside of the capsid.  
 738

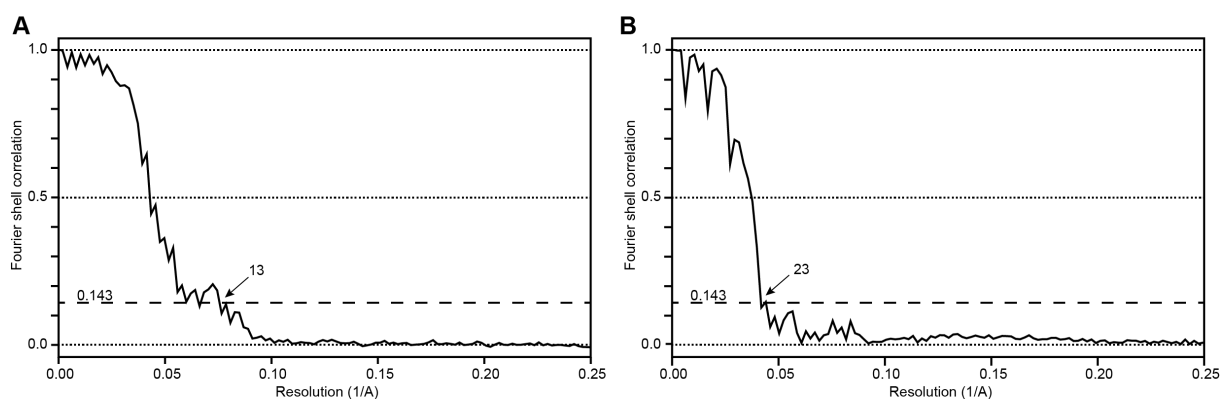

739  
 740 **Supplementary Figure 2. The gold standard FSC resolution curves of the asymmetric**  
 741 **reconstructions.** (A) FSC curve of the outer layer. (B) FSC curve of the core.

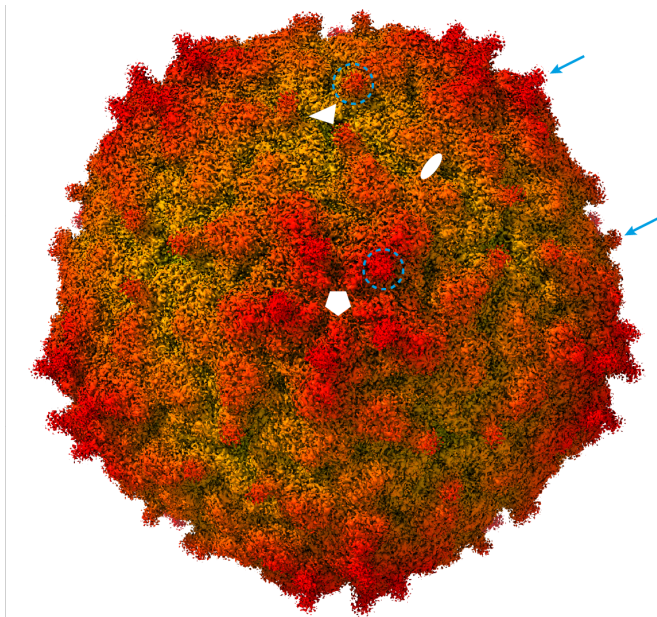

742  
743 **Supplementary Figure 2. Cryo-EM 3D reconstruction of the CtenDNAV-II capsid at low**  
744 **contour level.** Unmodelled densities around the three- and five-fold axes are indicated with blue  
745 arrows and circles, which correspond to the C-terminal ends of subunit A and B. The capsid is viewed  
746 down the five-fold axis and radially coloured from blue to red. The positions of the five-, three-, and  
747 two-fold axes are shown by a white pentamer, triangle, and ellipse, respectively.  
748

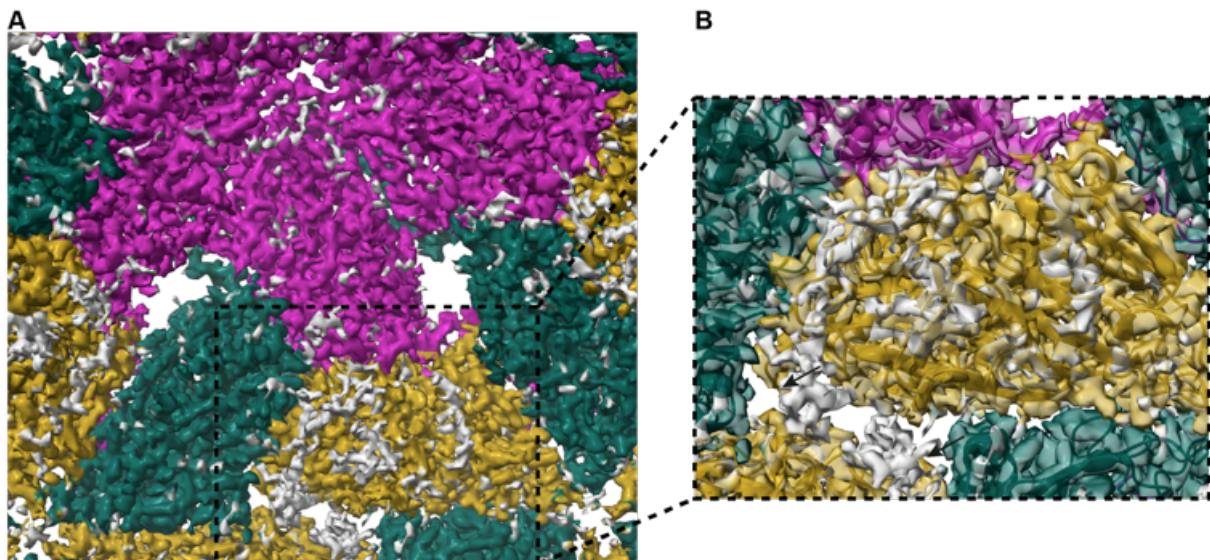

749  
750 **Supplementary Figure 3. Unmodelled density is visualized on the inside of the capsid below the**  
751 **C subunit.** (A) Inside view of the cryo-EM reconstruction coloured based on the atomic model of the  
752 three subunits. By decreasing the contour level, unmodelled densities are visualized in grey. (B)  
753 Close-up view of the C subunit, where the reconstruction is transparent to reveal the model in ribbon  
754 representation. The last modelled residues in the C-termini of the two 2-fold symmetry related C  
755 subunits are indicated with black arrows.

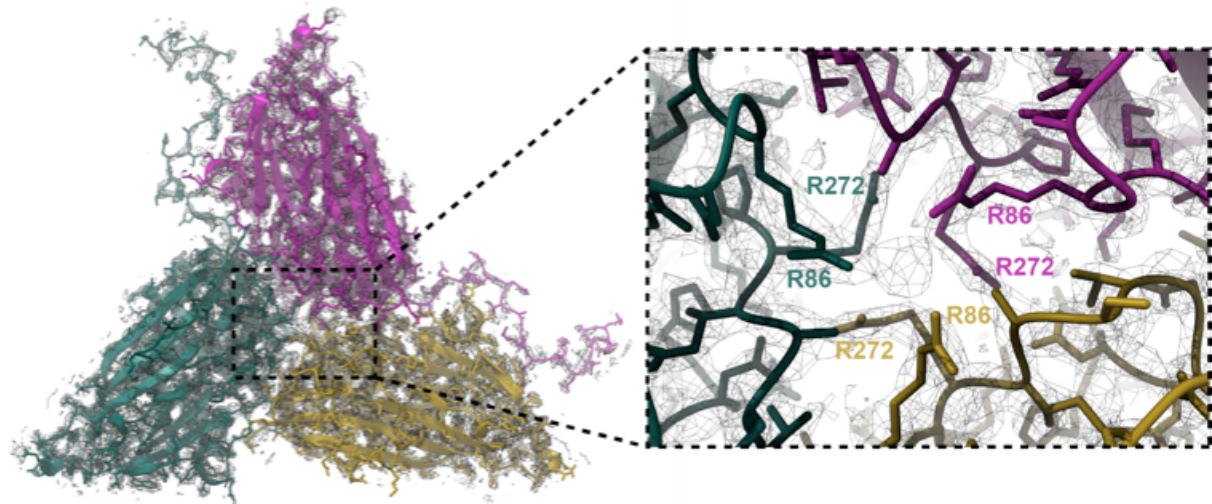

756  
757 **Supplementary Figure 4. Putative ion located in the subunit interface.** The model of a single  
758 icosahedral protomer viewed from the inside of the capsid and corresponding cryo-EM map is  
759 visualized to the left. To the right, is a close-up view of the subunit interface, displaying density in the  
760 centre possibly originating from an ion and the surrounding arginine residues.  
761

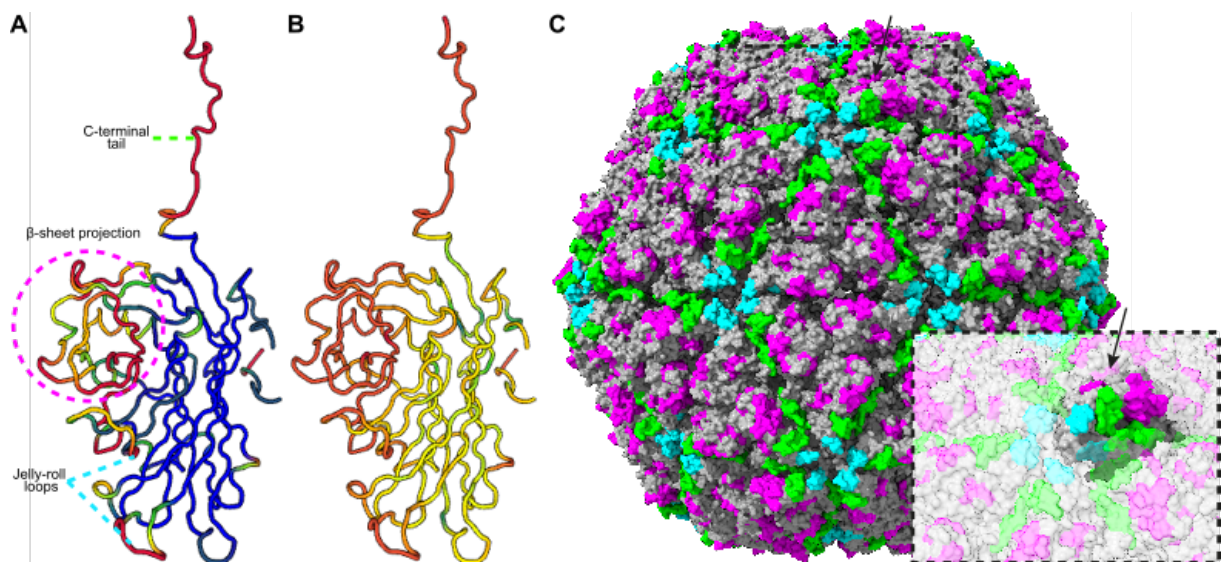

762  
763 **Supplementary Figure 5. Superimposition performed by the DALI server of the CtenDNAV-II**  
764 **capsid protein against corresponding capsid proteins from viruses in Fig. 3B.** The figures show  
765 CtenDNAV-II subunit A coloured according to (A) structural conservation and (B) sequence  
766 conservation where conservation mapping goes from blue for the highest values through green to red  
767 for the lowest values. (A) The three areas where structural conservation has the lowest values; the C-  
768 terminal tail,  $\beta$ -sheet projection, and jelly-roll loops C'-C'' and H-I are highlighted in green, magenta  
769 and cyan dashed lines. (C) The entire capsid rendered with a surface representation viewed down an  
770 icosahedral two-fold axis. The amino acids with lowest structural conservation (red in panel A) are  
771 coloured green, magenta and cyan that corresponds to the areas N-terminal tail,  $\beta$ -sheet projection and  
772 jelly-roll loops labelled in (A). The insert is zooming in on one of the five-folds and highlights one A-  
773 subunit and the C-terminus (green) coming from the B-subunit in an adjacent five-fold related  
774 protomer.

775  
776

| Strain    | PDGRMLESLP | RRCQLVTEIR | NNVTVGSNPT | YILVAPSLGL | AFQAYQDTNV | PGGLDSSVYG |
|-----------|------------|------------|------------|------------|------------|------------|
| SS10V-8V  |            |            |            |            |            |            |
| SS10V-35V |            |            |            |            |            |            |
| 2-6_11V10 |            |            |            |            |            |            |
| 2-6_11V12 |            |            |            |            |            |            |
| 2-6_10V07 |            |            |            |            |            |            |
| 2-6_10V05 |            |            |            |            |            |            |
| 2-6_10V17 |            |            |            |            |            |            |
| 2-6_10V20 |            |            |            |            |            |            |
| SS10V-24V |            |            |            |            |            |            |
| 2-6_10V27 |            |            |            |            |            |            |
| 2-6_10V33 |            |            |            |            |            |            |
| 2-6_11V04 |            |            |            |            |            |            |
| 2-6_11V08 |            |            |            |            |            |            |
| 2-6_11V06 |            |            |            |            |            |            |
| 2-6_11V17 |            |            |            |            |            |            |

777

| Strain    | LQNRGCTVRA | NLSATSIENY | NDIAKWRIVS | QGINLKLNNV | EDENDGWYEA | CRFQHDWTPD | ELCLRSTEND |
|-----------|------------|------------|------------|------------|------------|------------|------------|
| SS10V-8V  |            |            |            |            |            |            |            |
| SS10V-35V |            |            |            |            |            |            |            |
| 2-6_11V10 |            |            |            |            |            |            |            |
| 2-6_11V12 |            |            |            |            |            |            |            |
| 2-6_10V07 |            |            |            |            |            |            |            |
| 2-6_10V05 |            |            |            |            |            |            |            |
| 2-6_10V17 |            |            |            |            |            |            |            |
| 2-6_10V20 |            |            |            |            |            |            |            |
| SS10V-24V |            |            |            |            |            |            |            |
| 2-6_10V27 |            |            |            |            |            |            |            |
| 2-6_10V33 |            |            |            |            |            |            |            |
| 2-6_11V04 |            |            |            |            |            |            |            |
| 2-6_11V08 |            |            |            |            |            |            | S          |
| 2-6_11V06 |            |            |            |            |            |            |            |
| 2-6_11V17 |            |            |            |            |            |            |            |

778

| Strain    | ASTISQEDDL | VMGVISSSFL | NGALNTIGNN | MVEQRGYESG | LLKNIHKRMF | QLHNNTSAIR | PKTLQGQFNY |
|-----------|------------|------------|------------|------------|------------|------------|------------|
| SS10V-8V  |            |            | M          |            |            |            |            |
| SS10V-35V |            |            | S          |            |            |            |            |
| 2-6_11V10 |            |            |            |            |            |            |            |
| 2-6_11V12 |            |            |            |            |            |            |            |
| 2-6_10V07 |            |            |            |            |            |            |            |
| 2-6_10V05 |            |            |            |            |            |            |            |
| 2-6_10V17 | TNN        |            |            |            |            |            |            |
| 2-6_10V20 |            |            |            |            |            |            |            |
| SS10V-24V | T          |            |            |            |            |            |            |
| 2-6_10V27 |            |            |            |            |            |            |            |
| 2-6_10V33 |            |            |            |            |            |            |            |
| 2-6_11V04 |            |            |            |            |            |            |            |
| 2-6_11V08 | NS         |            |            |            |            |            |            |
| 2-6_11V06 | NS         |            |            |            |            |            |            |
| 2-6_11V17 |            |            |            |            |            |            |            |

779

| Strain    | GSEITFSGTE | SEARFTDVPS | NRQLVDSLWH | NDYDCILIKL | YPRENTGAAG | QTGSALIVNA | IQNLELQYSP |            |
|-----------|------------|------------|------------|------------|------------|------------|------------|------------|
| SS10V-8V  |            |            |            |            |            |            |            |            |
| SS10V-35V |            |            |            |            |            |            |            |            |
| 2-6_11V10 |            |            |            |            |            | R          | AKRPHCKR   | YSKFGAAIFS |
| 2-6_11V12 |            |            |            |            |            | R          |            |            |
| 2-6_10V07 |            | N          |            |            |            |            |            |            |
| 2-6_10V05 |            | N          |            |            |            |            |            |            |
| 2-6_10V17 |            |            |            |            |            | R          |            |            |
| 2-6_10V20 |            | N          |            |            |            |            |            |            |
| SS10V-24V |            |            |            |            |            |            |            |            |
| 2-6_10V27 |            |            |            |            |            |            |            |            |
| 2-6_10V33 |            | N          |            |            |            |            |            |            |
| 2-6_11V04 | I          |            |            |            |            |            | AKRPHCKR   | YSKFGAAIFS |
| 2-6_11V08 | I          |            |            |            |            |            |            |            |
| 2-6_11V06 |            |            |            |            |            |            |            |            |
| 2-6_11V17 |            |            |            |            |            | R          |            |            |

780

| Strain    | TSDLSTYHIA | NKRARMVEAK | LDKKNNTDAA | GEPFVPGSSR* |
|-----------|------------|------------|------------|-------------|
| SS10V-8V  |            |            |            | *           |
| SS10V-35V |            |            |            | *           |
| 2-6_11V10 | N*         |            |            |             |
| 2-6_11V12 |            |            | P          | T*          |
| 2-6_10V07 |            |            |            | *           |
| 2-6_10V05 |            |            |            | *           |
| 2-6_10V17 |            | K G        | P          | T*          |
| 2-6_10V20 |            |            |            | *           |
| SS10V-24V |            |            |            | *           |
| 2-6_10V27 |            | G          |            | T*          |
| 2-6_10V33 |            |            |            | *           |
| 2-6_11V04 | N*         |            |            |             |
| 2-6_11V08 |            |            |            | *           |
| 2-6_11V06 |            |            |            | *           |
| 2-6_11V17 |            |            | P          | T*          |

781

782 **Supplementary Figure 6. Amino acid alignment of capsid proteins from 15 CtenDNAV-II strains.** The consensus sequence is displayed in grey and the  
783 mutations in colour. The amino acids are organised in the same scheme as in Figure 2 with divisions into 70 residues per line, which are further subdivided  
784 into blocks of 10 residues by spaces within the sequence. The N-termini were not successfully sequenced and the first residue is therefore P81. This paper  
785 describes the structure of strain SS10V-8V.

786

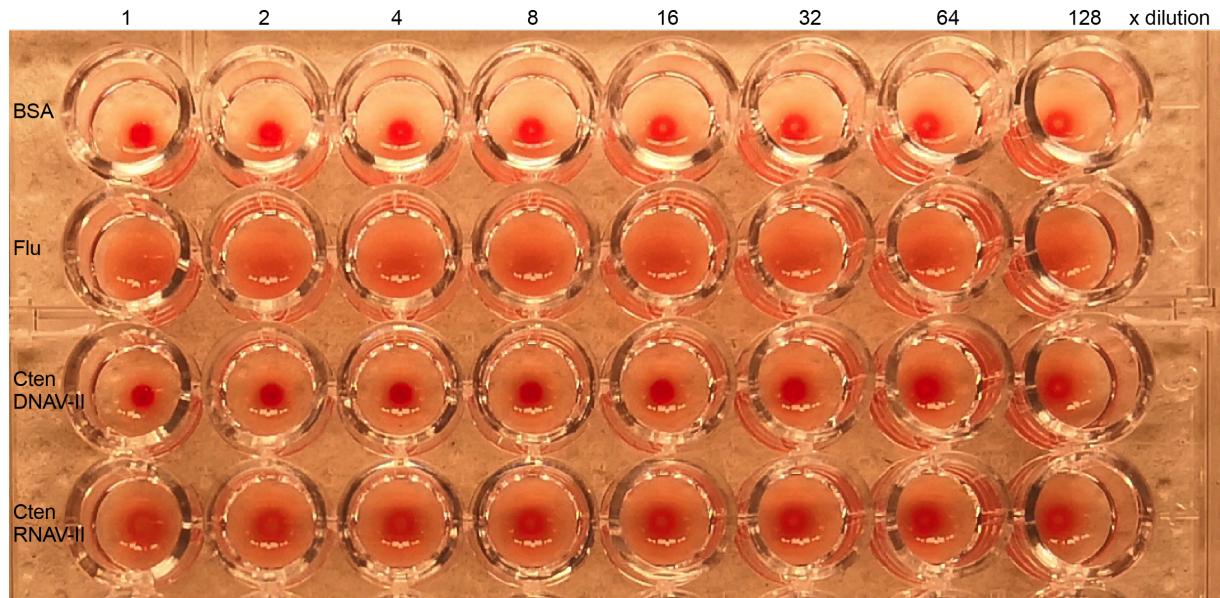

787

788

789

790

791

**Supplementary Figure 7. Hemagglutination inhibition assay.** Twofold serially diluted 1 mg/mL BSA, influenza virus (flu), CtenDNAV-II and CtenRNV-II are tested for HI activity. The BSA and flu were used for negative and positive controls for the assay.

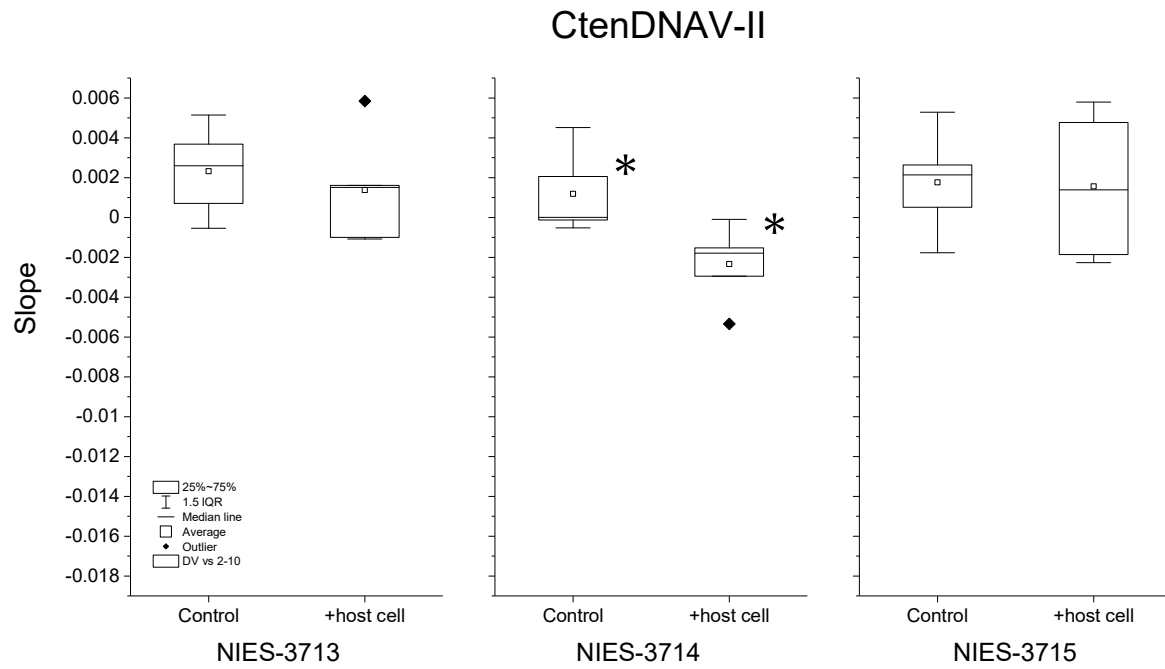

792

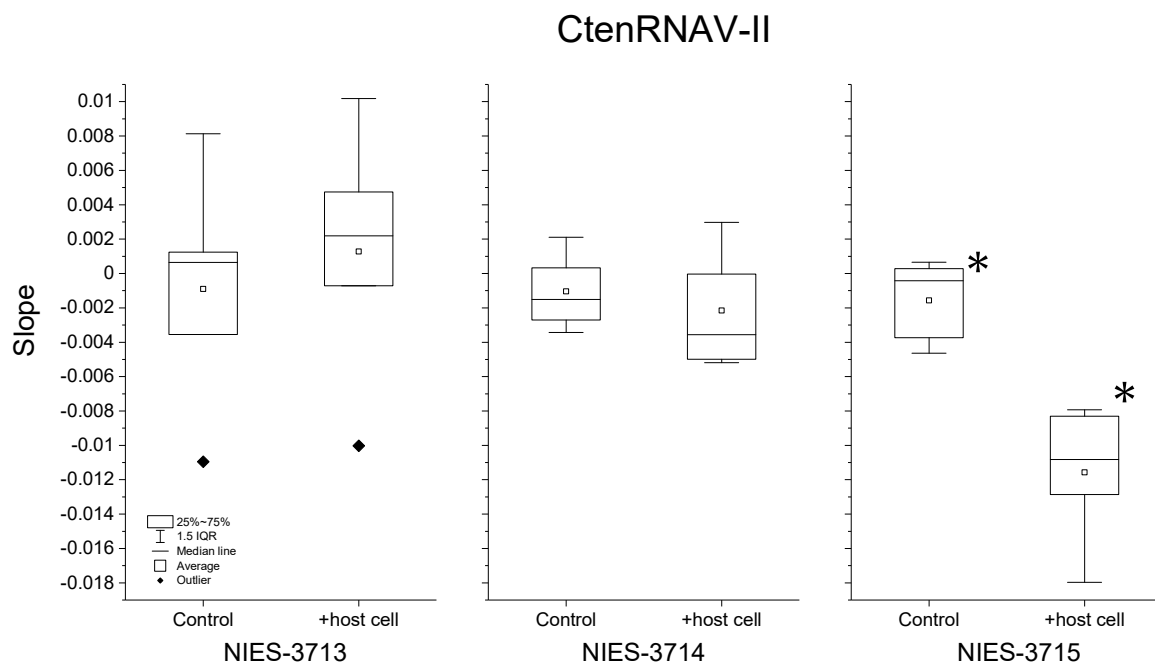

793

794

795

796

797

798

799

**Supplementary Fig. 8. Adsorption tests between viruses and diatoms.** The results are shown in slope of free virus titer in a culture for 2h (see materials and methods). Significant differences were detected in CtenDNAV-II vs. NIES-3714, and CtenRNAV-II vs. NIES-3715 (t-test,  $p < 0.05$ ,  $n = 5$ ). Their adsorption coefficients were  $1.4 \pm 0.9 \times 10^{-9} \text{ mL min}^{-1}$  and  $2.7 \pm 1.1 \times 10^{-9} \text{ mL min}^{-1}$ , respectively. NIES-3713: *Chaetoceros socialis* f. *radians*; NIES-3714: *Chaetoceros tenuissimus*; NIES-3715: *Chaetoceros tenuissimus*.



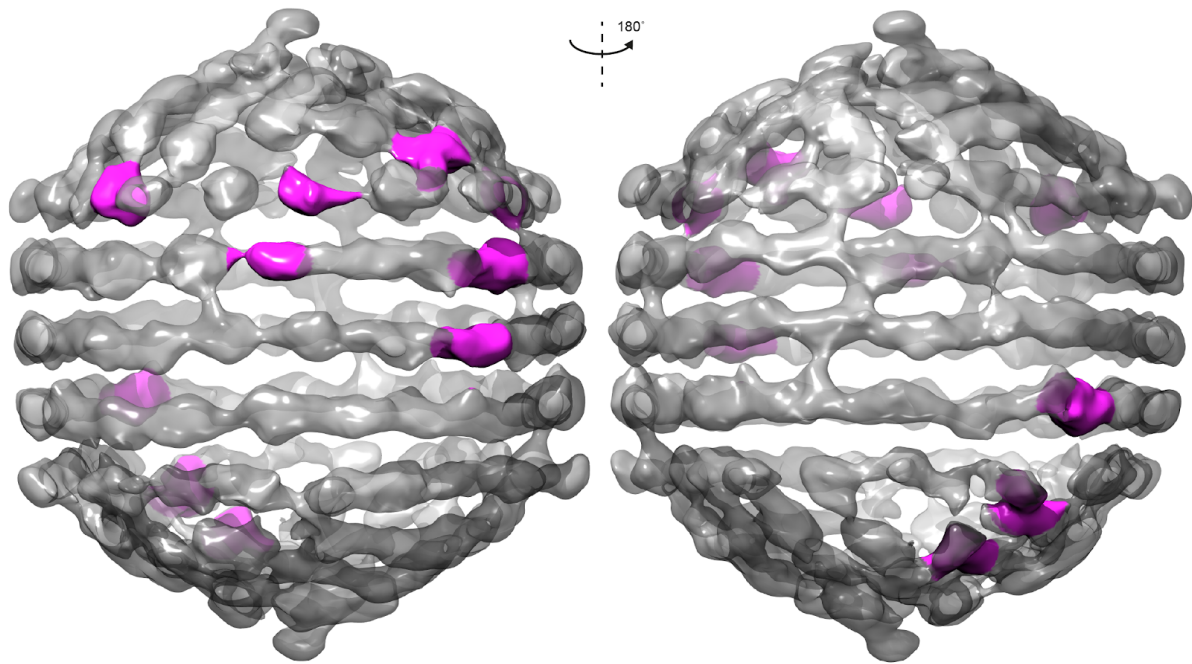

800  
801  
802  
803  
804  
805  
806

**Supplementary Figure 9. Connections between the outer genome layer and the core.** The outer genome layer where the sites that connect to the core are highlighted in magenta. The connections between the outer genome layer and the core seem to be confined to two specific areas on approximately opposite sides. One area is shown in the left panel and the second is shown to the right, which is rotated 180°.

## 807 **Supplementary methods**

### 808 **Sequencing of viral capsid protein gene**

809 Two hundred  $\mu$ L of *C. tenuissimus* NIES-3715 strain culture was added to each well of a 96-well  
810 culture plate, and 10  $\mu$ L of virus strains (SS10V-8V, SS10V-24V, SS10V-35V, 2-6\_10V-05, 2-  
811 6\_10V-07, 2-6\_10V-17, 2-6\_10V-20, 2-6\_10V-27, 2-6\_10V-33, 2-6\_11V-04, 2-6\_11V-06, 2-6\_11V-  
812 08, 2-6\_11V-10, 2-6\_11V-12, 2-6\_11V-17) isolated from *C. tenuissimus* were added to each separate  
813 well. Diatom cultures with viral solution were grown at 15 °C in modified SWM3 medium (Kimura  
814 and Tomaru, 2015) under a 12/12-h light-dark cycle of ca. 110-150 mmol of photons / m<sup>2</sup> / s<sup>1</sup> by  
815 using white fluorescent illumination. After 24 hours of viral inoculation, the cultures were transferred  
816 to microtubes and the cells were pelleted by centrifugation. One hundred  $\mu$ L of TE were added to each  
817 cell pellet, and they were heated at 100 °C for 10 min. These solutions were used as DNA samples.  
818 The PCR reaction was conducted as follows: 1 cycle at 94 °C for 2 min, 25 cycles each at 94 °C for 30  
819 s, 60 °C for 30 s, 72 °C for 1 min, and 1 cycle at 72 °C for 10 min. The primer set of middle part of the  
820 gene (P31\_CtDV-Ari-F2: 5'-AGCAACCACAAATCCCCG-3'; P32\_CtDV-Ari-R1: 5'-  
821 ATTTTGAATAGCGTTTACAATGAG-3') and the primer set of last part of the gene  
822 (CtD2V\_VP2inF1: 5'-AATACTAGTGCCATTCGTCC-3', CtD2V\_VP2outR2: 5'-  
823 ACTACCATCATGATTGAGACTG-3'), they detect the gene for the viral capsid protein were used.  
824 Each PCR product was purified with the ISOSPIN PCR Product (Nippon gene, Tokyo) and sequenced  
825 on an ABI 3130 DNA Analyzer using the Sanger dideoxy method. Each DNA sequence was  
826 combined and converted to amino acid sequences. The partial capsid protein amino acid sequences of  
827 each virus were automatically aligned using Clustal W.

### 828 **Hemagglutination inhibition (HI) assay**

829 The HI test was performed according to classical procedures. The purified BSA, influenza virus (flu),  
830 CtenDNAV-II and CtenRNAV-II were adjusted to 1 mg/mL in PBS. Twofold serial dilutions of these  
831 samples were prepared for the assay, of which 25  $\mu$ L of each dilution was incubated with 50  $\mu$ L of 125  
832 times PBS-diluted red blood cells from sheep blood (Hâtunalab). The assay was conducted in a V-  
833 bottom, 96-well plate. The plate was incubated for 1 hr at RT, and used for observing the  
834 hemagglutination of the red blood cells.

### 835 **Adsorption test**

#### 836 *Host diatom*

837 The virus adsorption kinetics of CtenDNAV-II and CtenRNAV-II was examined using the following  
838 diatom strains: *Chaetoceros socialis* f. *radians* NIES3713, *C. tenuissimus* NIES-3714 and *C.*  
839 *tenuissimus* NIES-3715. Previously reported compatibilities between host diatoms and viruses based  
840 on (Kimura and Tomaru, 2015) are as following:

|                                                     | CtenDNAV-II | CtenRNAV-II |
|-----------------------------------------------------|-------------|-------------|
| <i>C. socialis</i> f. <i>radians</i> NIES3713 (L-4) | Not lysed   | Lysed       |
| <i>C. tenuissimus</i> NIES-3714 (2-6)               | Lysed*      | Not lysed   |
| <i>C. tenuissimus</i> NIES-3715 (2-10)              | Lysed       | Lysed*      |

841 \*original host-virus combination

#### 842 *Viral inocula*

843 Exponentially growing cultures of *C. tenuissimus* NIES-3715 were inoculated with CtenDNAV-II and  
844 CtenRNAV-II (0.1% v v<sup>-1</sup>), which were stored at 4°C in the dark, and incubated for 7 d under the  
845 growth conditions described above. Lysates were passed through a 0.2- $\mu$ m polycarbonate membrane

846 filter (Whatman® Nuclepore Track-Etched Membranes, Merck KGaA, Darmstadt, Germany) to  
847 remove cellular debris and stored at 4°C. Filtered lysates were used as experimental inocula.

#### 848 *Virus enumeration*

849 The number of infectious viral units was determined using the extinction dilution method (Suttle,  
850 1993). Briefly, stored filtrates were rapidly thawed at 25°C, and then diluted with SWM3 medium in a  
851 series of 10-fold dilution steps. Aliquots (100 µL) of each dilution were added to 8 wells in cell-  
852 culture plates with 96 flat-bottom wells and mixed with 150 µL of an exponentially growing host  
853 algae culture, *C. tenuissimus* NIES-3715. The cell culture plates were incubated at 20°C under a 12:12  
854 h light:dark cycle of 130–150 µmol photons·m<sup>-2</sup>·s<sup>-1</sup> (cool white fluorescent illumination) and cultures  
855 were monitored using an optical microscope (Nikon Ti, Tokyo, Japan) for up to 14 d for culture lysis.  
856 Culture lysis due to viral infection was usually observed as a complete degradation of the host cells in  
857 a well. Virus abundance was calculated from the number of wells in which algal lysis occurred using a  
858 BASIC programme as previously described (Nishihara et al., 1986).

#### 859 *Adsorption test*

860 The host cell cultures were grown in SWM3 medium under a 12:12 h light:dark cycle of  
861 approximately 400 µmol of photons·m<sup>-2</sup>·s<sup>-1</sup> using white LED illumination at 25°C for *C. tenuissimus*  
862 (NIES-3714 and -3715) and 20°C for *C. socialis* f. *radians* (NIES-3713). Cell counts were performed  
863 immediately with no fixation using Fuchs-Rosenthal hemocytometer or an image-based cytometer  
864 (Tali® Image Cytometer, Thermo Fisher Scientific Ltd., Waltham, MA, USA) (Tomaru and Kimura,  
865 2016). When the cultures reached stationary phase, cell concentration of >10<sup>6</sup> cells mL<sup>-1</sup>, 20 mL of the  
866 culture was poured into a sterilized polystyrene flask (n=5). An aliquot of the culture was passed  
867 through a 0.2µm pore sized filter to remove the diatom cells. The resultant filtrate was poured into the  
868 polystyrene flask as a control (n=5). The virus suspensions were inoculated into these cell-suspended  
869 and filtrate cultures at 0.1%v/v (20µL). The virus inoculations were conducted during 1h and 2h after  
870 the light cycle started. The final virus titers in the cultures were set at 10<sup>5</sup>~10<sup>6</sup> infectious units mL<sup>-1</sup>  
871 (multiplicity of infections = 10<sup>-1</sup>~10<sup>0</sup>).

872 Aliquots of the cultures were sampled at just after virus inoculations (0h), 1h and 2h of post  
873 inoculation. The samples were used for cell counts and unadsorbed virus enumeration. The samples  
874 used for viral titer estimations (infectious units mL<sup>-1</sup>) were passed through 0.2-µm filters (DISMIC®-  
875 25CS020AS, Advantec, Tokyo, Japan) to remove cellular debris. Filtrates were stored at -80°C until  
876 analysis.

877 The adsorption coefficient (Cd; mL min<sup>-1</sup>) was determined as follows (Tarutani et al., 2006):

$$878 \quad C_d = \frac{\alpha - \alpha_c}{N}$$

879 where  $\alpha$  (min<sup>-1</sup>) and  $\alpha_c$  (min<sup>-1</sup>) is the slope determined by linear regression for the natural logarithm of  
880 the percentage of free viruses in diatom cell culture and control culture against sampling time,  
881 respectively. N (cells mL<sup>-1</sup>) is the host cell number.
